# Supplementary material for: Identification of potent anticancer copper(ii) complexes containing tripodal bis[2-ethyl-di(3,5-dialkyl-1H-pyrazol-1-yl)]amine moiety
Source: Royal Society of Chemistry journal article supplement (doi:10.1039/d1dt01724a), 2021-01-01
Supplement: d1dt01724a1.pdf [file d1dt01724a1.pdf]

## Electronic Supplementary Information (ESI)

### Identification of potent anticancer copper(II) complexes containing tripodal bis[2-ethyl-di(3,5-dialkyl-1*H*-pyrazol-1-yl)]amine moiety†

Salah S. Massoud,<sup>\*a,b</sup> Febee R. Louka,<sup>a</sup> Madison T. Dial,<sup>a</sup> Andrew J. Malek,<sup>a</sup> Roland C. Fischer,<sup>c</sup> Franz A. Mautner,<sup>\*d</sup> Ján Vančo,<sup>e</sup> Tomáš Malina,<sup>e</sup> Zdeněk Dvořák,<sup>f</sup> and Zdeněk Trávníček<sup>\*e</sup>

<sup>a</sup> *Department of Chemistry, University of Louisiana at Lafayette, P.O. Box 43700, Lafayette, LA 70504, U. S. A.*

<sup>b</sup> *Department of Chemistry, Faculty of Science, Alexandria University, Moharam Bey, Alexandria, Egypt*

<sup>c</sup> *Institut für Anorganische Chemische, Technische Universität Graz, Stremayrgasse 9/V, A-8010 Graz, Austria*

<sup>d</sup> *Institut für Physikalische and Theoretische Chemie, Technische Universität Graz, Stremayrgasse 9/II, A-8010, Graz, Austria*

<sup>e</sup> *Czech Advanced Technology and Research Institute, Regional Centre of Advanced Technologies and Materials, Palacký University, Křížkovského 511/8, CZ-779 00 Olomouc, Czech Republic*

<sup>f</sup> *Department of Cell Biology and Genetics, Faculty of Science, Palacký University, Šlechtitelů 27, CZ-783 71 Olomouc, Czech Republic*

## Index

| <u>Title</u>                                                                                                                                                                               | <u>p. #</u> |
|--------------------------------------------------------------------------------------------------------------------------------------------------------------------------------------------|-------------|
| X-ray crystal structure analysis .....                                                                                                                                                     | 3           |
| Table S1. Crystallographic data and processing parameters .....                                                                                                                            | 4           |
| Table S2: Selected bond distances (Å) and bond angles (°) of complexes<br><b>1-CIO<sub>4</sub></b> , <b>2-CIO<sub>4</sub></b> , <b>4-CIO<sub>4</sub></b> and <b>5-PF<sub>6</sub></b> ..... | 5           |
| Table S3: Non-covalent interactions of <b>1-CIO<sub>4</sub></b> .....                                                                                                                      | 6           |
| Table S4: Non-covalent interactions of <b>2-CIO<sub>4</sub></b> .....                                                                                                                      | 8           |
| Table S5: Non-covalent interactions of <b>4-CIO<sub>4</sub></b> .....                                                                                                                      | 10          |
| Table S6: Non-covalent interactions of <b>5-PF<sub>6</sub></b> .....                                                                                                                       | 12          |
| Table S7: Cell cycle distribution (% cells) in the individual cell cycle phases .....                                                                                                      | 13          |
| Fig. S1: Packing view of <b>1-CIO<sub>4</sub></b> .....                                                                                                                                    | 14          |
| Fig. S2: Packing view of <b>2-CIO<sub>4</sub></b> .....                                                                                                                                    | 14          |
| Fig. S3: Packing view of <b>4-CIO<sub>4</sub></b> .....                                                                                                                                    | 15          |
| Fig. S4: Packing view of <b>5-PF<sub>6</sub></b> .....                                                                                                                                     | 15          |
| Fig. S5: Spectral changes of complex <b>1-PF<sub>6</sub></b> in: CH <sub>3</sub> CN and<br>H <sub>2</sub> O/CH <sub>3</sub> CN solutions.....                                              | 16          |
| Fig. S6. Spectrophotometric titration of <b>2-CIO<sub>4</sub></b> in H <sub>2</sub> O/CH <sub>3</sub> CN solutions .....                                                                   | 16          |
| Fig. S7: Spectral changes of complex <b>4-PF<sub>6</sub></b> in CH <sub>3</sub> CN and H <sub>2</sub> O/CH <sub>3</sub> CN solutions. ..                                                   | 17          |
| Fig. S8: The ESI-MS spectra of samples containing the [Cu(L <sup>1</sup> )Cl]PF <sub>6</sub> .....                                                                                         | 18          |
| Fig. S9: The ESI-MS spectra of samples containing the [Cu(L <sup>2</sup> )Cl]ClO <sub>4</sub> ·H <sub>2</sub> O .....                                                                      | 19          |
| Fig. S10: Solid IR spectrum of <b>L<sup>1</sup></b> . .....                                                                                                                                | 20          |
| Fig. S11: ESI-MS of <b>L<sup>1</sup></b> in MeOH. ....                                                                                                                                     | 20          |
| Fig. S12: <sup>1</sup> H and <sup>13</sup> C NMR spectra of <b>L<sup>1</sup></b> in <i>d</i> <sub>6</sub> -DMSO .....                                                                      | 21          |
| Fig. S13: Solid IR spectrum of <b>L<sup>3</sup></b> .....                                                                                                                                  | 22          |
| Fig. S14: Solid IR spectrum of <b>L<sup>4</sup></b> .....                                                                                                                                  | 22          |
| Fig. S15: ESI-MS of <b>L<sup>4</sup></b> in MeOH .....                                                                                                                                     | 23          |
| Fig. S16: <sup>1</sup> H and <sup>13</sup> C NMR spectra of <b>L<sup>4</sup></b> in <i>d</i> <sub>6</sub> -DMSO .....                                                                      | 24          |
| Fig. S16: Solid IR spectrum of <b>L<sup>5</sup></b> . .....                                                                                                                                | 25          |
| Fig. S18: ESI-MS of <b>L<sup>5</sup></b> in MeOH .....                                                                                                                                     | 26          |
| Fig. S19: <sup>1</sup> H and <sup>13</sup> C NMR spectra of <b>L<sup>5</sup></b> in <i>d</i> <sub>6</sub> -DMSO .....                                                                      | 27          |
| Fig. S20: Solid IR spectrum of complex <b>1-PF<sub>6</sub></b> .....                                                                                                                       | 28          |
| Fig. S21: Electronic spectrum of complex <b>1-PF<sub>6</sub></b> in acetonitrile.....                                                                                                      | 28          |
| Fig. S22: Solid IR spectrum of complex <b>1-CIO<sub>4</sub></b> . .....                                                                                                                    | 29          |
| Fig. S23: ESI-MS of complex <b>1-CIO<sub>4</sub></b> in CH <sub>3</sub> CN .....                                                                                                           | 29          |
| Fig. S24: Electronic spectrum of complex <b>1-CIO<sub>4</sub></b> in acetonitrile.....                                                                                                     | 30          |
| Fig. S25: Solid IR spectrum of complex <b>2-CIO<sub>4</sub></b> . .....                                                                                                                    | 31          |
| Fig. S26: ESI-MS of complex <b>2-CIO<sub>4</sub></b> in CH <sub>3</sub> CN. ....                                                                                                           | 31          |
| Fig. S27: Electronic spectrum of complex <b>2-CIO<sub>4</sub></b> in CH <sub>3</sub> CN.....                                                                                               | 32          |
| Fig. S28: Solid IR spectrum of complex <b>3-PF<sub>6</sub></b> . .....                                                                                                                     | 33          |
| Fig. S29: Electronic spectrum of complex <b>3-PF<sub>6</sub></b> in CH <sub>3</sub> CN. ....                                                                                               | 33          |
| Fig. S30: Solid IR spectrum of complex <b>4-CIO<sub>4</sub></b> . .....                                                                                                                    | 34          |
| Fig. S31: Electronic spectrum of complex <b>4-CIO<sub>4</sub></b> in CH <sub>3</sub> CN. ....                                                                                              | 34          |
| Fig. S32: Solid IR spectrum of complex <b>5-PF<sub>6</sub></b> .....                                                                                                                       | 35          |
| Fig. S33: ESI-MS of complex <b>5-PF<sub>6</sub></b> in CH <sub>3</sub> CN .....                                                                                                            | 35          |
| Fig. S34: Electronic spectrum of complex <b>5-PF<sub>6</sub></b> in CH <sub>3</sub> CN .....                                                                                               | 36          |

---

## X-ray crystal structure analysis

The X-ray single-crystal data of compounds were collected on a Bruker-AXS APEX-II CCD diffractometer at 100(2) K. The crystallographic data, conditions retained for the intensity data collection and some features of the structure refinements are listed in Table S1. The intensities were collected with Mo-K $\alpha$  radiation ( $\lambda = 0.71073$  Å). Data processing, Lorentz-polarization and absorption corrections were performed using SAINT, APEX and the SADABS computer programs.<sup>S1</sup> The structures were solved by direct methods and refined by full-matrix least-squares methods on F<sup>2</sup>, using the SHELX program package.<sup>S2</sup> All non-hydrogen atoms were refined anisotropically. The hydrogen atoms were located from difference Fourier maps, assigned with isotropic displacement factors and included in the final refinement cycles by use of geometrical constraints. Further programs used: Mercury [S3],<sup>S3</sup> Olex<sup>S4</sup> and Platon.<sup>S5</sup>

## References

- S1. (a) Bruker (2005) SAINT v. 7.23; Bruker (2006) APEX 2, v. 2.0-2, Bruker AXS Inc., Madison, Wisconsin, USA, 2005.;  
(b) G. M. Sheldrick, SADABS v. 2, University of Goettingen, Germany, 2001.
- S2. (a) G. M. Sheldrick, *Acta Cryst.* 2008, **A64**, 112-122.  
(b) G. M. Sheldrick, *Acta Cryst.* 2015, **C71**, 3-8.
- S3. C. F. Macrae, P. R. Edington, P. McCabe, E. Pidcock, G. P. Shields, R. Taylor, T. Towler and J. van de Streek, *J. Appl. Cryst.* 2009, **39**, 453;
- S4. O. V. Dolomanov, L. J. Bourhis, R. J. Gildea, J. A. K. Howard and H. Puschmann *J. Appl. Cryst.* 2009, **42**, 339-341.
- S5. A. L. Spek, "PLATON , a multipurpose crystallographic tool." Utrecht University, Utrecht, The Netherlands, 2001.

**Table S1.** Crystallographic data and processing parameters

| Compound                               | 1-ClO <sub>4</sub>                                                                  | 2-ClO <sub>4</sub>                                                              | 4-ClO <sub>4</sub>                                                              | 5-PF <sub>6</sub>                                                   |
|----------------------------------------|-------------------------------------------------------------------------------------|---------------------------------------------------------------------------------|---------------------------------------------------------------------------------|---------------------------------------------------------------------|
| Empirical formula                      | C <sub>21.5</sub> H <sub>32</sub> Cl <sub>2</sub> CuN <sub>6</sub> O <sub>4.5</sub> | C <sub>22</sub> H <sub>32</sub> Cl <sub>2</sub> CuN <sub>6</sub> O <sub>6</sub> | C <sub>20</sub> H <sub>31</sub> Cl <sub>2</sub> CuN <sub>7</sub> O <sub>4</sub> | C <sub>25</sub> H <sub>33</sub> ClCuF <sub>6</sub> N <sub>7</sub> P |
| Formula mass                           | 580.98                                                                              | 610.97                                                                          | 567.96                                                                          | 675.54                                                              |
| System                                 | Triclinic                                                                           | Monoclinic                                                                      | Monoclinic                                                                      | Triclinic                                                           |
| Space group                            | P-1                                                                                 | C 2/c                                                                           | C 2/c                                                                           | P-1                                                                 |
| a (Å)                                  | 10.9839(4)                                                                          | 20.3521(9)                                                                      | 21.6070(7)                                                                      | 10.5750(6)                                                          |
| b (Å)                                  | 12.3595(5)                                                                          | 20.4978(9)                                                                      | 12.1524(4)                                                                      | 12.4521(7)                                                          |
| c (Å)                                  | 12.5141(5)                                                                          | 15.1917(7)                                                                      | 19.2083(6)                                                                      | 13.0589(8)                                                          |
| α (°)                                  | 115.690(2)                                                                          | 90                                                                              | 90                                                                              | 69.599(3)                                                           |
| β (°)                                  | 108.072(2)                                                                          | 104.876(2)                                                                      | 102.879(2)                                                                      | 68.263(3)                                                           |
| γ (°)                                  | 100.254(2)                                                                          | 90                                                                              | 90                                                                              | 71.979(3)                                                           |
| V (Å <sup>3</sup> )                    | 1355.13(10)                                                                         | 6125.2(5)                                                                       | 4916.9(3)                                                                       | 1464.70(15)                                                         |
| Z                                      | 2                                                                                   | 8                                                                               | 8                                                                               | 2                                                                   |
| T (K)                                  | 100(2)                                                                              | 100(2)                                                                          | 100(2)                                                                          | 100(2)                                                              |
| μ (mm <sup>-1</sup> )                  | 1.043                                                                               | 0.930                                                                           | 1.147                                                                           | 0.959                                                               |
| D <sub>calc</sub> (Mg/m <sup>3</sup> ) | 1.424                                                                               | 1.325                                                                           | 1.534                                                                           | 1.532                                                               |
| θ max (°)                              | 26.999                                                                              | 25.999                                                                          | 30.050                                                                          | 27.000                                                              |
| Data collected                         | 26771                                                                               | 79236                                                                           | 153829                                                                          | 51180                                                               |
| Unique refl. / R <sub>int</sub>        | 5889 / 0.0770                                                                       | 6021 / 0.0346                                                                   | 7171 / 0.0230                                                                   | 6401 / 0.0414                                                       |
| Parameters / Restraints                | 526 / 269                                                                           | 368 / 18                                                                        | 379 / 42                                                                        | 375 / 0                                                             |
| Goodness-of-Fit on F <sup>2</sup>      | 1.136                                                                               | 1.073                                                                           | 1.057                                                                           | 1.036                                                               |
| R1 / wR2 (all data)                    | 0.0544 / 0.1509                                                                     | 0.0515 / 0.1386                                                                 | 0.0308 / 0.0741                                                                 | 0.0373 / 0.0875                                                     |

**Table S2.** Selected bond distances (Å) and bond angles (°) of complexes **1-ClO<sub>4</sub>**, **2-ClO<sub>4</sub>**, **4-ClO<sub>4</sub>** and **5-PF<sub>6</sub>**.

|                                                     |            |            |            |
|-----------------------------------------------------|------------|------------|------------|
| <b>1-ClO<sub>4</sub></b>                            |            |            |            |
| Cu1-N2A                                             | 2.11(2)    | Cu1-N6     | 2.231(3)   |
| Cu1-N1                                              | 2.098(3)   | Cu1-Cl1    | 2.2762(10) |
| Cu1-N4A                                             | 2.146(17)  |            |            |
| N2A-Cu1-N4A                                         | 163.0(9)   | N1-Cu1-Cl1 | 147.71(11) |
| <b>2-ClO<sub>4</sub></b>                            |            |            |            |
| Cu1-N4                                              | 1.997(3)   | Cu1-N2     | 1.995(3)   |
| Cu1-N6                                              | 2.246(3)   | Cu1-Cl1    | 2.3023(11) |
| Cu1-N1                                              | 2.134(2)   |            |            |
| N2-Cu1-N4                                           | 166.34(12) | N1-Cu1-Cl1 | 153.33(8)  |
| <b>4-ClO<sub>4</sub></b>                            |            |            |            |
| Cu1-N1                                              | 2.2248(13) | Cu1-N7     | 2.053(15)  |
| Cu1-N3                                              | 2.0199(13) | Cu1-N9     | 2.213(12)  |
| Cu1-N5                                              | 1.9880(12) | Cu1-Cl1    | 2.2727(5)  |
| N3-Cu1-N5                                           | 165.67(5)  | N1-Cu1-Cl1 | 142.10(4)  |
| <b>5-PF<sub>6</sub></b>                             |            |            |            |
| Cu1-N5                                              | 2.0027(18) | Cu1-N1     | 2.1710(18) |
| Cu1-N7                                              | 2.0164(18) | Cu1-Cl1    | 2.2810(6)  |
| Cu1-N3                                              | 2.1551(19) |            |            |
| N5-Cu1-N7                                           | 165.72(7)  | N1-Cu1-Cl1 | 148.25(5)  |
| <b>6 [Cu(bedmpzp)Cl]PF<sub>6</sub><sup>a)</sup></b> |            |            |            |
| Cu1-N1                                              | 2.005(4)   | Cu1-N3     | 1.991(4)   |
| Cu1-N2                                              | 2.147(4)   | Cl1-N1     | 2.2868(12) |
| Cu1-N5                                              | 2.291(4)   |            |            |
| N2-Cu1-Cl1                                          | 161.64(11) | N3-Cu1-N1  | 166.17(15) |

<sup>a)</sup> Data taken from Ref 38

**Table S3. Non-covalent interactions of 1-ClO<sub>4</sub>**

5-Membered Ring ( 1 ) N3A --> N4A --> C12A --> C11A --> C10A  
 5-Membered Ring ( 2 ) N5 --> N6 --> C19 --> C18 --> C17  
 5-Membered Ring ( 3 ) N3B --> N4B --> C10B --> C11B --> C12B  
 6-Membered Ring ( 4 ) N2A --> C2A --> C3A --> C4A --> C5A --> C6A  
 6-Membered Ring ( 5 ) N2B --> C2B --> C3B --> C4B --> C5B --> C6B

Ring-Interactions with Cg-Cg Distances < 6.0 Ang., Alpha < 20.000 Deg., Beta < 60.0 Deg.

- Cg(I) = Plane number I (= ring number in () above)
- Alpha = Dihedral Angle between Planes I and J (Deg)
- Beta = Angle Cg(I)-->Cg(J) or Cg(I)-->Me vector and normal to plane I (Deg)
- Gamma = Angle Cg(I)-->Cg(J) vector and normal to plane J (Deg)
- Cg-Cg = Distance between ring Centroids (Ang.)
- CgI\_Perp = Perpendicular distance of Cg(I) on ring J (Ang.)
- CgJ\_Perp = Perpendicular distance of Cg(J) on ring I (Ang.)
- Slippage = Distance between Cg(I) and Perpendicular Projection of Cg(J) on Ring I (Ang).

| Cg(I) | Cg(J) | [ARU(J)]  | Cg-Cg     | Alpha   | Beta | Gamma | CgI_Perp   | CgJ_Perp   | Slippage |
|-------|-------|-----------|-----------|---------|------|-------|------------|------------|----------|
| Cg1   | Cg1   | [2667.01] | 4.980(8)  | 0       | 49.8 | 49.8  | 3.214(7)   | 3.214(7)   | 3.805    |
| Cg1   | Cg2   | [1555.01] | 4.967(6)  | 88.0(7) | 57.0 | 50.5  | 3.160(5)   | 2.707(2)   |          |
| Cg1   | Cg3   | [2666.01] | 4.809(15) | 12      | 37.1 | 38.0  | 3.790(7)   | 3.835(14)  | 2.901    |
| Cg1   | Cg4   | [2666.01] | 4.577(9)  | 20.5(9) | 33.4 | 28.2  | 4.035(6)   | 3.821(7)   |          |
| Cg1   | Cg5   | [2667.01] | 5.262(10) | 12      | 50.9 | 41.8  | 3.922(6)   | 3.317(9)   | 4.085    |
| Cg2   | Cg1   | [1555.01] | 4.967(6)  | 88.0(7) | 50.5 | 57.0  | 2.707(2)   | 3.160(5)   |          |
| Cg2   | Cg1   | [2667.01] | 4.932(5)  | 88.0(7) | 10.9 | 84.1  | 0.508(2)   | 4.843(5)   |          |
| Cg2   | Cg2   | [2556.01] | 4.620(3)  | 0.0(2)  | 41.5 | 41.5  | 3.4577(14) | 3.4577(14) | 3.064    |
| Cg2   | Cg3   | [1555.01] | 5.029(12) | 80      | 50.9 | 59.4  | 2.563(2)   | 3.170(11)  |          |
| Cg2   | Cg4   | [1555.01] | 5.357(6)  | 73.6(6) | 50.8 | 62.9  | 2.445(2)   | 3.383(5)   |          |
| Cg2   | Cg5   | [1555.01] | 5.304(9)  | 77.8(8) | 51.6 | 62.2  | 2.477(2)   | 3.291(7)   |          |
| Cg2   | Cg5   | [2667.01] | 4.890(7)  | 77.8(8) | 15.5 | 71.4  | 1.562(2)   | 4.712(7)   |          |
| Cg3   | Cg1   | [2666.01] | 4.809(15) | 12      | 38.0 | 37.1  | 3.835(14)  | 3.790(7)   | 2.961    |
| Cg3   | Cg2   | [1555.01] | 5.028(12) | 80      | 59.4 | 50.9  | 3.170(11)  | 2.563(2)   |          |
| Cg3   | Cg5   | [2666.01] | 4.517(16) | 23      | 36.0 | 28.9  | 3.953(14)  | 3.655(9)   |          |
| Cg4   | Cg1   | [2666.01] | 4.576(9)  | 20.5(9) | 28.2 | 33.4  | 3.821(7)   | 4.034(6)   |          |
| Cg4   | Cg3   | [2555.01] | 5.685(12) | 10      | 58.0 | 60.4  | 2.806(7)   | 3.015(14)  | 4.820    |
| Cg4   | Cg4   | [2555.01] | 5.386(8)  | 0.0(9)  | 55.9 | 55.9  | 3.021(7)   | 3.021(7)   | 4.459    |
| Cg4   | Cg5   | [2666.01] | 4.295(11) | 29      | 26.6 | 26.1  | 3.857(7)   | 3.840(9)   |          |
| Cg5   | Cg1   | [2667.01] | 5.262(10) | 12      | 41.8 | 50.9  | 3.317(9)   | 3.922(6)   | 3.508    |
| Cg5   | Cg3   | [2666.01] | 4.517(16) | 23      | 28.9 | 36.0  | 3.656(9)   | 3.953(14)  |          |
| Cg5   | Cg4   | [2666.01] | 4.295(11) | 29      | 26.1 | 26.6  | 3.840(9)   | 3.857(7)   |          |
| Cg5   | Cg5   | [2667.01] | 5.558(12) | 0       | 43.4 | 43.4  | 4.039(9)   | 4.039(9)   | 3.817    |

[ 2667] = 1-X,1-Y,2-Z

[ 1555] = X,Y,Z

[ 2666] = 1-X,1-Y,1-Z

[ 2556] = -X,-Y,1-Z

[ 2555] = -X,-Y,-Z

Analysis of X-H...Cg(Pi-Ring) Interactions (H..Cg < 3.0 Ang. - Gamma < 40.0 Deg)

- Cg(J) = Center of gravity of ring J (Plane number above)
- H-Perp = Perpendicular distance of H to ring plane J
- Gamma = Angle between Cg-H vector and ring J normal
- X-H..Cg = X-H-Cg angle (degrees)
- X..Cg = Distance of X to Cg (Angstrom)

| X--H(I) | Res(I) | Cg(J) | [ARU(J)]  | H..Cg | H-Perp | Gamma | X-H..Cg | X..Cg     |
|---------|--------|-------|-----------|-------|--------|-------|---------|-----------|
| C11A    | -H11A  | Cg2   | [2667.01] | 2.90  | 2.87   | 8.74  | 155     | 3.787(10) |
| C20     | -H20A  | Cg2   | [2556.01] | 2.71  | -2.70  | 3.15  | 142     | 3.535(4)  |
| C13B    | -H13F  | Cg5   | [2666.01] | 2.93  | 2.30   | 38.43 | 144     | 3.774(16) |

[ 2667] = 1-X,1-Y,2-Z

[ 2556] = -X,-Y,1-Z

[ 2666] = 1-X,1-Y,1-Z

The Cg(I) refer to the Ring Centre-of-Gravity numbers given in ( ) in the Ring-Analysis above

| Cg(I) | x           | y           | z           | Xo          | Yo        | Zo         |
|-------|-------------|-------------|-------------|-------------|-----------|------------|
| Cg1   | 0.5951(5)   | 0.5379(5)   | 0.8574(5)   | 2.024(6)    | 1.213(7)  | 8.698(5)   |
| Cg2   | 0.12824(16) | 0.21432(16) | 0.66024(13) | -1.6260(19) | -1.497(2) | 6.6976(14) |
| Cg3   | 0.1297(10)  | 0.2385(10)  | 0.2697(10)  | -0.147(12)  | 1.224(14) | 2.736(10)  |
| Cg4   | 0.1427(6)   | 0.2187(5)   | 0.2381(5)   | 0.162(6)    | 1.180(7)  | 2.415(5)   |
| Cg5   | 0.6322(7)   | 0.5448(7)   | 0.8583(7)   | 2.414(9)    | 1.291(9)  | 8.707(7)   |

#### Analysis of Potential Hydrogen Bonds and Schemes

| Res    | Donor--- | H....Acceptor | [ARU]     | D-H  | H...A | D...A     | D-H...A |
|--------|----------|---------------|-----------|------|-------|-----------|---------|
| 4>O5   | --H90    | ..            | ?         | 0.91 |       |           |         |
| 1>C8A  | --H8AB   | ..O1          | [1555.02] | 0.99 | 2.57  | 3.512(9)  | 158     |
| 1>C8A  | --H8AB   | ..O3          | [1555.02] | 0.99 | 2.41  | 2.936(8)  | 112'    |
| 1>C4A  | --H4A    | ..O2          | [1454.02] | 0.95 | 2.53  | 3.267(9)  | 135     |
| 1>C7A  | --H7A3   | ..Cl1         | ∅         | 0.98 | 2.63  | 3.42(2)   | 137     |
| 1>C5A  | --H5A    | ..O4          | [1454.02] | 0.95 | 2.51  | 3.363(17) | 149     |
| 1>C1A  | --H1AA   | ..Cl1         | [2666.01] | 0.99 | 2.73  | 3.711(8)  | 174     |
| 1>C9A  | --H9AB   | ..Cl1         | [2666.01] | 0.99 | 2.80  | 3.593(8)  | 138     |
| 1>C14A | --H14A   | ..Cl1         | ∅         | 0.98 | 2.60  | 3.415(17) | 141     |
| C18    | --H18    | ..O3          | [1455.02] | 0.95 | 2.38  | 3.263(7)  | 155     |

:: No Classic Hydrogen Bonds Found

#### Translation of ARU-Code to CIF and Equivalent Position Code

[ 2666.] = [ 2\_666] = 1-x,1-y,1-z  
 [ 1454.] = [ 1\_454] = -1+x,y,-1+z  
 [ 1455.] = [ 1\_455] = -1+x,y,z

**Table S4. Non-covalent interactions of 2-ClO<sub>4</sub>**

|                      |     |        |         |         |         |        |  |  |  |
|----------------------|-----|--------|---------|---------|---------|--------|--|--|--|
| 5-Membered Ring ( 1) | Cu1 | --> N1 | --> C1  | --> C2  | --> N2  |        |  |  |  |
| 5-Membered Ring ( 2) | N3  | --> N4 | --> C13 | --> C12 | --> C11 |        |  |  |  |
| 5-Membered Ring ( 3) | N5  | --> N6 | --> C20 | --> C19 | --> C18 |        |  |  |  |
| 6-Membered Ring ( 4) | Cu1 | --> N1 | --> C9  | --> C10 | --> N3  | --> N4 |  |  |  |
| 6-Membered Ring ( 6) | N2  | --> C2 | --> C3  | --> C4  | --> C5  | --> C6 |  |  |  |

Ring-Interactions with Cg-Cg Distances < 6.0 Ang., Alpha < 20.000 Deg., Beta < 60.0 Deg.

- Cg(I) = Plane number I (= ring number in () above)
- Alpha = Dihedral Angle between Planes I and J (Deg)
- Beta = Angle Cg(I)-->Cg(J) or Cg(I)-->Me vector and normal to plane I (Deg)
- Gamma = Angle Cg(I)-->Cg(J) vector and normal to plane J (Deg)
- Cg-Cg = Distance between ring Centroids (Ang.)
- CgI\_Perp = Perpendicular distance of Cg(I) on ring J (Ang.)
- CgJ\_Perp = Perpendicular distance of Cg(J) on ring I (Ang.)
- Slippage = Distance between Cg(I) and Perpendicular Projection of Cg(J) on Ring I (Ang).

| Cg(I) | Cg(J) | [ARU(J)]  | Cg-Cg    | Alpha     | Beta | Gamma | CgI_Perp   | CgJ_Perp   | Slippage |
|-------|-------|-----------|----------|-----------|------|-------|------------|------------|----------|
| Cg2   | Cg6   | [7667.01] | 4.576(2) | 23.12(19) | 13.2 | 26.1  | 4.1092(15) | 4.4553(14) |          |
| Cg3   | Cg3   | [7666.01] | 4.519(2) | 0.0(2)    | 43.7 | 43.7  | 3.2677(17) | 3.2677(17) | 3.122    |
| Cg3   | Cg6   | [1555.01] | 4.868(2) | 84.6(2)   | 35.1 | 51.9  | 3.0034(16) | 3.9813(15) |          |
| Cg6   | Cg2   | [7667.01] | 4.576(2) | 23.12(19) | 26.1 | 13.2  | 4.4552(14) | 4.1092(15) |          |
| Cg6   | Cg3   | [1555.01] | 4.868(2) | 84.6(2)   | 51.9 | 35.1  | 3.9812(15) | 3.0034(16) |          |
| Cg6   | Cg6   | [2656.01] | 4.343(2) | 6.16(17)  | 39.3 | 39.3  | 3.3611(14) | 3.3610(14) | 2.750    |

[ 7667] = 3/2-X,3/2-Y,2-Z  
 [ 7666] = 3/2-X,3/2-Y,1-Z  
 [ 1555] = X,Y,Z  
 [ 2656] = 1-X,Y,3/2-Z

Analysis of X-H...Cg(Pi-Ring) Interactions (H..Cg < 3.0 Ang. - Gamma < 40.0 Deg)

- Cg(J) = Center of gravity of ring J (Plane number above)
- H-Perp = Perpendicular distance of H to ring plane J
- Gamma = Angle between Cg-H vector and ring J normal
- X-H..Cg = X-H-Cg angle (degrees)
- X..Cg = Distance of X to Cg (Angstrom)

| X-- | H(I)  | Cg(J) | [ARU(J)]  | H..Cg | H-Perp | Gamma | X-H..Cg | X..Cg    |
|-----|-------|-------|-----------|-------|--------|-------|---------|----------|
| C8  | -H8C  | Cg3   | [2656.01] | 2.83  | -2.58  | 24.37 | 148     | 3.704(5) |
| C21 | -H21C | Cg3   | [7666.01] | 2.61  | 2.61   | 1.25  | 139     | 3.417(5) |

[ 2656] = 1-X,Y,3/2-Z  
 [ 7666] = 3/2-X,3/2-Y,1-Z

The Cg(I) refer to the Ring Centre-of-Gravity numbers given in () in the Ring-Analysis above

| Cg(I) | x          | y          | z           | Xo          | Yo          | Zo          |
|-------|------------|------------|-------------|-------------|-------------|-------------|
| Cg2   | 0.89122(8) | 0.66376(8) | 0.85354(10) | 14.8094(17) | 13.6057(17) | 12.5321(15) |
| Cg3   | 0.71782(8) | 0.80202(8) | 0.61328(11) | 12.2172(17) | 16.4397(17) | 9.0045(16)  |
| Cg6   | 0.59747(7) | 0.78234(7) | 0.85063(10) | 8.8423(15)  | 16.0362(14) | 12.4895(14) |

Analysis of Potential Hydrogen Bonds and Schemes

| Res | Donor--- | H...Acceptor | [ARU]     | D-H  | H...A | D...A     | D-H...A |
|-----|----------|--------------|-----------|------|-------|-----------|---------|
| C1  | --H1A    | ..Cl1        | [7667.01] | 0.99 | 2.69  | 3.453(4)  | 134     |
| C5  | --H5     | ..O7B        | [6656.02] | 0.95 | 2.41  | 3.309(9)  | 157     |
| C6  | --H6     | ..O5         | [6656.02] | 0.95 | 2.59  | 3.322(5)  | 134     |
| C10 | --H10B   | ..O6B        | [4565.02] | 0.99 | 2.51  | 3.257(9)  | 132     |
| C14 | --H14A   | ..O5         | [1555.02] | 0.98 | 2.44  | 3.339(6)  | 153     |
| C14 | --H14B   | ..O7A        | [4565.02] | 0.98 | 2.22  | 3.163(10) | 160     |
| C14 | --H14C   | ..O7B        | [2756.02] | 0.98 | 2.30  | 3.187(12) | 150     |
| C15 | --H15C   | ..Cl1        | []        | 0.98 | 2.79  | 3.512(4)  | 131     |
| C16 | --H16A   | ..O1         | [2656.01] | 0.99 | 2.59  | 3.377(5)  | 136     |
| C17 | --H17A   | ..O4         | [1555.02] | 0.99 | 2.60  | 3.545(6)  | 160     |



|     |        |       |           |      |      |           |      |
|-----|--------|-------|-----------|------|------|-----------|------|
| C19 | --H19  | ..O6A | [7666.02] | 0.95 | 2.56 | 3.456(11) | 156  |
| C19 | --H19  | ..O6B | [7666.02] | 0.95 | 2.55 | 3.498(9)  | 172' |
| C21 | --H21A | ..O4  | [7666.02] | 0.98 | 2.55 | 3.474(5)  | 157  |
| C22 | --H22B | ..Cl1 | []        | 0.98 | 2.72 | 3.652(4)  | 159  |
| C22 | --H22C | ..O5  | [6656.02] | 0.98 | 2.48 | 3.372(6)  | 151  |

:: No Classic Hydrogen Bonds Found

Translation of ARU-Code to CIF and Equivalent Position Code

[ 7667.] = [ 7\_667] = 3/2-x,3/2-y,2-z  
[ 2656.] = [ 2\_656] = 1-x,y,3/2-z  
[ 6656.] = [ 4\_656] = 3/2-x,1/2+y,3/2-z  
[ 4565.] = [ 6\_566] = x,1-y,1/2+z  
[ 2756.] = [ 2\_756] = 2-x,y,3/2-z  
[ 7666.] = [ 7\_666] = 3/2-x,3/2-y,1-z

**Table S5. Non-covalent interactions of 4-ClO<sub>4</sub>**

5-Membered Ring ( 1) N2 --> N3 --> C4 --> C3 --> C2  
 5-Membered Ring ( 2) N4 --> N5 --> C11 --> C10 --> C9  
 5-Membered Ring ( 3) N8 --> N9 --> C1C --> C1B --> C1A  
 5-Membered Ring ( 4) N6 --> N7 --> C18 --> C17 --> C16

Ring-Interactions with Cg-Cg Distances <6.0 Ang., Alpha <20.0 Deg., Beta <60.0 Deg.

- Cg(I) = Plane number I (= ring number in () above)
- Alpha = Dihedral Angle between Planes I and J (Deg)
- Beta = Angle Cg(I)-->Cg(J) or Cg(I)-->Me vector and normal to plane I (Deg)
- Gamma = Angle Cg(I)-->Cg(J) vector and normal to plane J (Deg)
- Cg-Cg = Distance between ring Centroids (Ang.)
- CgI\_Perp = Perpendicular distance of Cg(I) on ring J (Ang.)
- CgJ\_Perp = Perpendicular distance of Cg(J) on ring I (Ang.)
- Slippage = Distance between Cg(I) and Perpendicular Projection of Cg(J) on Ring I (Ang.)

| Cg(I) | Cg(J) | [ARU(J)]  | Cg-Cg      | Alpha     | Beta | Gamma | CgI_Perp  | CgJ_Perp  | Slippage |
|-------|-------|-----------|------------|-----------|------|-------|-----------|-----------|----------|
| Cg1   | Cg1   | [7636.01] | 5.6364(9)  | 0.00(9)   | 44.4 | 44.4  | 4.0252(7) | 4.0251(7) | 3.946    |
| Cg1   | Cg2   | [7636.01] | 5.5172(10) | 44.99(10) | 24.5 | 56.4  | 3.0551(7) | 5.0185(7) |          |
| Cg1   | Cg3   | [1555.01] | 4.525(5)   | 73.8(5)   | 29.1 | 44.7  | 3.2185(6) | 3.953(5)  |          |
| Cg1   | Cg3   | [2756.01] | 5.596(5)   | 76.0(5)   | 26.0 | 82.8  | 0.7006(6) | 5.029(5)  |          |
| Cg1   | Cg4   | [1555.01] | 4.366(5)   | 66.6(5)   | 31.1 | 36.2  | 3.5227(6) | 3.737(5)  |          |
| Cg1   | Cg4   | [2756.01] | 5.473(6)   | 76.5(5)   | 28.3 | 85.2  | 0.4586(6) | 4.819(5)  |          |
| Cg2   | Cg1   | [7636.01] | 5.5171(10) | 44.99(10) | 56.4 | 24.5  | 5.0186(7) | 3.0550(7) |          |
| Cg2   | Cg3   | [6646.01] | 5.547(5)   | 85.2(5)   | 12.3 | 74.2  | 1.5062(7) | 5.419(5)  |          |
| Cg2   | Cg4   | [6646.01] | 5.919(5)   | 79.9(5)   | 11.9 | 69.1  | 2.1090(7) | 5.792(5)  |          |
| Cg3   | Cg1   | [1555.01] | 4.526(5)   | 73.8(5)   | 44.7 | 29.1  | 3.953(5)  | 3.2186(6) |          |
| Cg3   | Cg2   | [1555.01] | 4.994(5)   | 89.0(5)   | 57.4 | 68.9  | 1.796(5)  | 2.6912(7) |          |
| Cg3   | Cg3   | [2756.01] | 4.602(8)   | 3.9(7)    | 34.6 | 34.6  | 3.788(5)  | 3.787(5)  | 2.615    |
| Cg3   | Cg4   | [2756.01] | 4.609(8)   | 11.2(7)   | 34.7 | 41.0  | 3.477(5)  | 3.789(5)  | 2.624    |
| Cg4   | Cg1   | [1555.01] | 4.366(5)   | 66.6(5)   | 36.2 | 31.1  | 3.737(5)  | 3.5228(6) |          |
| Cg4   | Cg3   | [2756.01] | 4.608(8)   | 11.2(7)   | 41.0 | 34.7  | 3.789(5)  | 3.476(5)  | 3.025    |
| Cg4   | Cg4   | [2756.01] | 4.583(8)   | 16.9(8)   | 39.8 | 39.8  | 3.522(5)  | 3.522(5)  | 2.933    |

[ 7636] = 3/2-X,-3/2-Y,1-Z

[ 1555] = X,Y,Z

[ 2756] = 2-X,Y,3/2-Z

[ 6646] = 3/2-X,-1/2+Y,3/2-Z

Analysis of X-H...Cg(Pi-Ring) Interactions (H..Cg < 3.0 Ang. - Gamma < 40.0 Deg)

- Cg(J) = Center of gravity of ring J (Plane number above)
- H-Perp = Perpendicular distance of H to ring plane J
- Gamma = Angle between Cg-H vector and ring J normal
- X-H..Cg = X-H-Cg angle (degrees)
- X..Cg = Distance of X to Cg (Angstrom)

| X   | --H(I) | Cg(J) | [ARU(J)]  | H..Cg | H-Perp | Gamma | X-H..Cg | X..Cg      |
|-----|--------|-------|-----------|-------|--------|-------|---------|------------|
| C1D | -H1DC  | Cg2   | [6656.01] | 2.78  | -2.67  | 16.13 | 130     | 3.485(9)   |
| C8  | -H8B   | Cg1   | [7636.01] | 2.89  | -2.81  | 13.30 | 145     | 3.7393(16) |

[ 6656] = 3/2-X,1/2+Y,3/2-Z

[ 7636] = 3/2-X,-3/2-Y,1-Z

The Cg(I) refer to the Ring Centre-of-Gravity numbers given in () in the Ring-Analysis above

| Cg(I) | x          | y           | z          | Xo         | Yo         | Zo         |
|-------|------------|-------------|------------|------------|------------|------------|
| Cg1   | 0.87880(3) | -0.69603(6) | 0.55256(3) | 16.6230(7) | -8.4584(7) | 10.3468(6) |
| Cg2   | 0.66406(3) | -0.59649(6) | 0.70930(4) | 11.3120(7) | -7.2487(7) | 13.2817(7) |
| Cg3   | 0.8986(2)  | -0.5359(4)  | 0.7691(3)  | 16.123(5)  | -6.513(5)  | 14.402(5)  |
| Cg4   | 0.8989(3)  | -0.5674(4)  | 0.7687(3)  | 16.132(6)  | -6.896(5)  | 14.394(5)  |

Analysis of Potential Hydrogen Bonds and Schemes

| Res   | Donor--- | H...Acceptor | [ARU]     | D-H  | H...A | D...A      | D-H...A |
|-------|----------|--------------|-----------|------|-------|------------|---------|
| C3    | --H3     | ..O3         | [2756.02] | 0.95 | 2.60  | 3.547(2)   | 176     |
| 1>C1D | --H1DB   | ..O2         | [3747.02] | 0.98 | 2.37  | 3.326(7)   | 165     |
| C5    | --H5B    | ..O2         | [2756.02] | 0.98 | 2.59  | 3.517(2)   | 158     |
| C5    | --H5C    | ..O2         | [4544.02] | 0.98 | 2.58  | 3.512(2)   | 159     |
| C6    | --H6A    | ..Cl1        | □         | 0.98 | 2.71  | 3.5781(18) | 148     |
| C8    | --H8A    | ..O3         | [6656.02] | 0.99 | 2.58  | 3.307(2)   | 130     |
| C14   | --H14B   | ..N2         | □         | 0.99 | 2.56  | 2.954(2)   | 104     |

:: No Classic Hydrogen Bonds Found

Translation of ARU-Code to CIF and Equivalent Position Code

[ 3747.] = [ 5\_747] = 2-x,-1-y,2-z  
[ 6656.] = [ 4\_656] = 3/2-x,1/2+y,3/2-z  
[ 4544.] = [ 6\_545] = x,-1-y,-1/2+z  
[ 2756.] = [ 2\_756] = 2-x,y,3/2-z

**Table S6. Non-covalent interactions of 5-PF<sub>6</sub>**

5-Membered Ring ( 1) Cu1 --> N1 --> C15 --> N6 --> N7  
 5-Membered Ring ( 2) N2 --> N3 --> C5 --> C4 --> C3  
 5-Membered Ring ( 3) N4 --> N5 --> C12 --> C11 --> C10  
 5-Membered Ring ( 4) N6 --> N7 --> C18 --> C17 --> C16  
 6-Membered Ring ( 5) Cu1 --> N1 --> C1 --> C2 --> N2  
 6-Membered Ring ( 6) Cu1 --> N1 --> C8 --> C9 --> N4 --> N5  
 6-Membered Ring ( 7) C19 --> C20 --> C21 --> C22 --> C23 --> C24

Ring-Interactions with Cg-Cg Distances < 6.0 Ang., Alpha < 20.000 Deg. and Beta < 60.0 Deg.

- Cg(I) = Plane number I (= ring number in () above)
- Alpha = Dihedral Angle between Planes I and J (Deg)
- Beta = Angle Cg(I)-->Cg(J) or Cg(I)-->Me vector and normal to plane I (Deg)
- Gamma = Angle Cg(I)-->Cg(J) vector and normal to plane J (Deg)
- Cg-Cg = Distance between ring Centroids (Ang.)
- CgI\_Perp = Perpendicular distance of Cg(I) on ring J (Ang.)
- CgJ\_Perp = Perpendicular distance of Cg(J) on ring I (Ang.)
- Slippage = Distance between Cg(I) and Perpendicular Projection of Cg(J) on Ring I (Ang.)
- P,Q,R,S = J-Plane Parameters for Carth. Coord. (Xo, Yo, Zo)

| Cg(I) | Cg(J) | [ARU(J)]  | Cg-Cg      | Alpha     | Beta | Gamma | CgI_Perp   | CgJ_Perp   | Slippage |
|-------|-------|-----------|------------|-----------|------|-------|------------|------------|----------|
| Cg2   | Cg3   | [1555.01] | 4.8080(16) | 81.61(14) | 49.6 | 56.2  | 2.6745(10) | 3.1158(10) |          |
| Cg2   | Cg3   | [2666.01] | 4.8080(16) | 81.61(14) | 14.9 | 84.0  | 0.5372(10) | 4.9575(10) |          |
| Cg2   | Cg4   | [1555.01] | 4.9143(15) | 82.00(14) | 51.5 | 51.6  | 3.0498(10) | 3.0613(10) |          |
| Cg3   | Cg2   | [1555.01] | 4.8079(16) | 81.61(14) | 56.2 | 49.6  | 3.1157(10) | 2.6744(10) |          |
| Cg3   | Cg3   | [2666.01] | 4.7155(16) | 0.00(14)  | 47.1 | 47.1  | 3.2116(10) | 3.2117(10) | 3.453    |
| Cg3   | Cg4   | [2656.01] | 4.6885(15) | 14.96(13) | 38.6 | 24.3  | 4.2747(10) | 3.6666(9)  | 2.922    |
| Cg3   | Cg7   | [2656.01] | 4.5953(14) | 36.31(13) | 21.4 | 54.0  | 2.6996(10) | 4.2779(10) |          |
| Cg4   | Cg2   | [1555.01] | 4.9143(15) | 82.00(14) | 51.6 | 51.5  | 3.0613(10) | 3.0497(10) |          |
| Cg4   | Cg3   | [2656.01] | 4.6885(15) | 14.96(13) | 24.3 | 38.6  | 3.6666(9)  | 4.2747(10) | 1.926    |
| Cg7   | Cg2   | [1545.01] | 5.9825(15) | 66.05(13) | 8.4  | 62.9  | 2.7265(10) | 5.9190(10) |          |
| Cg7   | Cg3   | [2656.01] | 4.5952(14) | 36.31(13) | 54.0 | 21.4  | 4.2778(10) | 2.6995(10) |          |
| Cg7   | Cg7   | [2655.01] | 3.9188(16) | 0.00(12)  | 23.2 | 23.2  | 3.6030(10) | 3.6030(10) | 1.541    |

[ 1555] = X,Y,Z  
 [ 2666] = 1-X,1-Y,1-Z  
 [ 2656] = 1-X,-Y,1-Z  
 [ 1545] = X,-1+Y,Z  
 [ 2655] = 1-X,-Y,-Z

Analysis of X-H...Cg(Pi-Ring) Interactions (H..Cg < 3.0 Ang. - Gamma < 40.0 Deg)

- Cg(J) = Center of gravity of ring J (Plane number above)
- H-Perp = Perpendicular distance of H to ring plane J
- Gamma = Angle between Cg-H vector and ring J normal
- X-H..Cg = X-H-Cg angle (degrees)
- X..Cg = Distance of X to Cg (Angstrom)
- X-H, Pi = Angle of the X-H bond with the Pi-plane (i.e.' Perp. = 90 degr., Para. = 0 degr.)

| X  | --H(I) | Cg(J) | [ARU(J)]  | H..Cg | H-Perp | Gamma | X-H..Cg | X..Cg    |
|----|--------|-------|-----------|-------|--------|-------|---------|----------|
| C6 | -H6AB  | Cg7   | [1565.01] | 2.99  | -2.84  | 18.42 | 136     | 3.757(3) |

[ 1565] = X,1+Y,Z

The Cg(I) refer to the Ring Centre-of-Gravity numbers given in ( ) in the Ring-Analysis above

| Cg(I) | x           | y           | z          | Xo          | Yo          | Zo         |
|-------|-------------|-------------|------------|-------------|-------------|------------|
| Cg2   | 0.85610(11) | 0.36457(8)  | 0.23978(8) | 11.6173(13) | 5.0875(10)  | 2.8046(10) |
| Cg3   | 0.43669(12) | 0.31845(8)  | 0.55100(8) | 8.5095(13)  | 5.5416(10)  | 6.4449(10) |
| Cg4   | 0.80260(9)  | -0.01270(8) | 0.23738(8) | 9.5866(10)  | 0.6125(10)  | 2.7766(9)  |
| Cg7   | 0.63537(12) | -0.12368(8) | 0.06824(8) | 6.5726(13)  | -1.2453(10) | 0.7982(9)  |

Potential Hydrogen Bonds and Schemes

| Res | Donor--- | H.Acceptor | [ARU]     | D-H  | H...A | D...A    | D-H.A |
|-----|----------|------------|-----------|------|-------|----------|-------|
| C1  | --H1AB   | ..N6       | []        | 0.99 | 2.60  | 2.986(3) | 103   |
| C1  | --H1AB   | ..F4       | [2665.02] | 0.99 | 2.54  | 3.111(3) | 116'  |
| C2  | --H2AB   | ..F2       | [1555.02] | 0.99 | 2.52  | 3.021(4) | 111   |
| C4  | --H4     | ..F1       | [1655.02] | 0.95 | 2.54  | 3.394(4) | 149   |
| C7  | --H7AB   | ..Cl1      | []        | 0.98 | 2.79  | 3.743(3) | 163   |
| C8  | --H8AB   | ..F1       | [1555.02] | 0.99 | 2.48  | 3.270(3) | 136   |
| C14 | --H14C   | ..F2       | [2666.02] | 0.98 | 2.41  | 3.365(3) | 165   |
| C15 | --H15A   | ..Cl1      | [2656.01] | 0.99 | 2.57  | 3.491(2) | 155   |
| C25 | --H25B   | ..Cl1      | []        | 0.98 | 2.82  | 3.603(2) | 138   |

:: No Classic Hydrogen Bonds Found

Translation of ARU-Code to CIF and Equivalent Position Code

[ 2656.] = [ 2\_656] = 1-x,-y,1-z  
 [ 2665.] = [ 2\_665] = 1-x,1-y,-z  
 [ 2666.] = [ 2\_666] = 1-x,1-y,1-z  
 [ 1655.] = [ 1\_655] = 1+x,y,z

**Table S7.** Cell cycle distribution (% cells) in the individual cell cycle phases, determined by flow cytometry with the Annexin V-FITC/PI staining of the A2780 cells treated for 24 h by the equitoxic concentrations of complexes **1-PF<sub>6</sub>**, **2-CIO<sub>4</sub>** and **4-PF<sub>6</sub>**. Control is represented by untreated cells. *Cisplatin* was involved for comparative purposes.

|                                         | Concentration<br>[μM] | G0/G1 phase<br>[average %] | SD  | S phase<br>[average %] | SD  | G2/M<br>[average %] | SD  |
|-----------------------------------------|-----------------------|----------------------------|-----|------------------------|-----|---------------------|-----|
| Control                                 |                       | 56.4                       | 0.4 | 24.2                   | 0.4 | 19.5                | 0.7 |
| <b>1-PF<sub>6</sub></b>                 | 3                     | 47.3                       | 1.0 | 21.3                   | 0.8 | 31.4                | 1.7 |
| <b>2-CIO<sub>4</sub>·H<sub>2</sub>O</b> | 3                     | 45.3                       | 0.8 | 25.8                   | 0.7 | 28.9                | 0.3 |
| <b>4-PF<sub>6</sub></b>                 | 50                    | 31.4                       | 1.8 | 26.8                   | 1.4 | 41.9                | 0.9 |
| Cisplatin                               | 30                    | 52.4                       | 2.8 | 32.8                   | 1.7 | 14.8                | 1.2 |

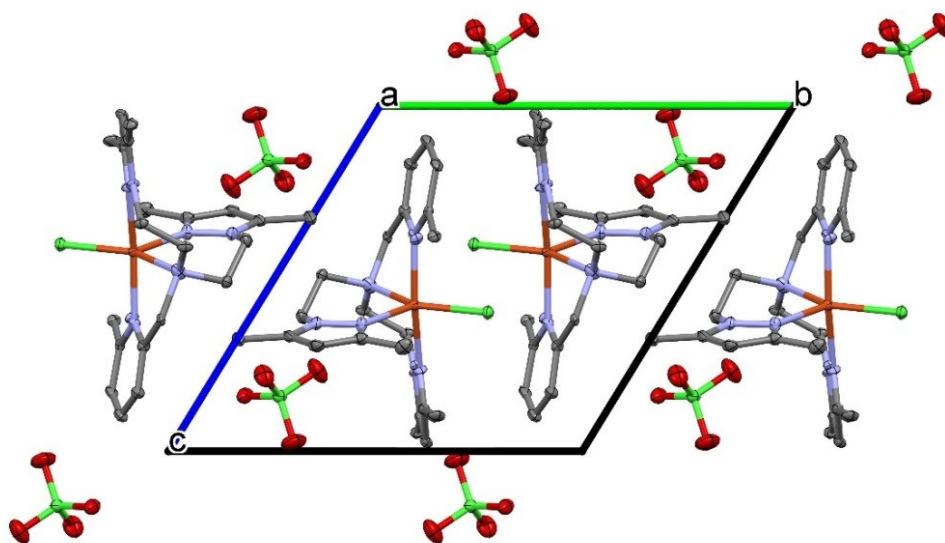

Fig. S1 Packing view of 1-ClO<sub>4</sub>

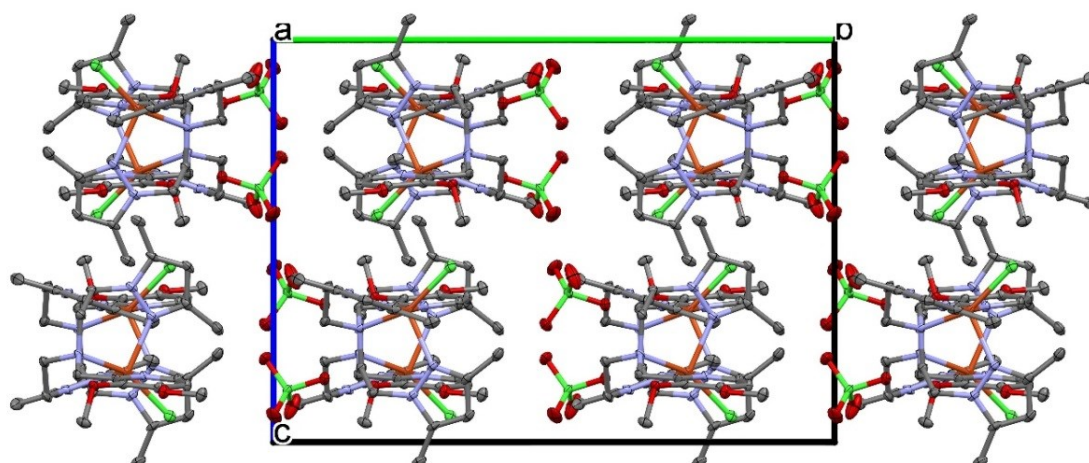

Fig. S2 Packing view of 2-ClO<sub>4</sub>

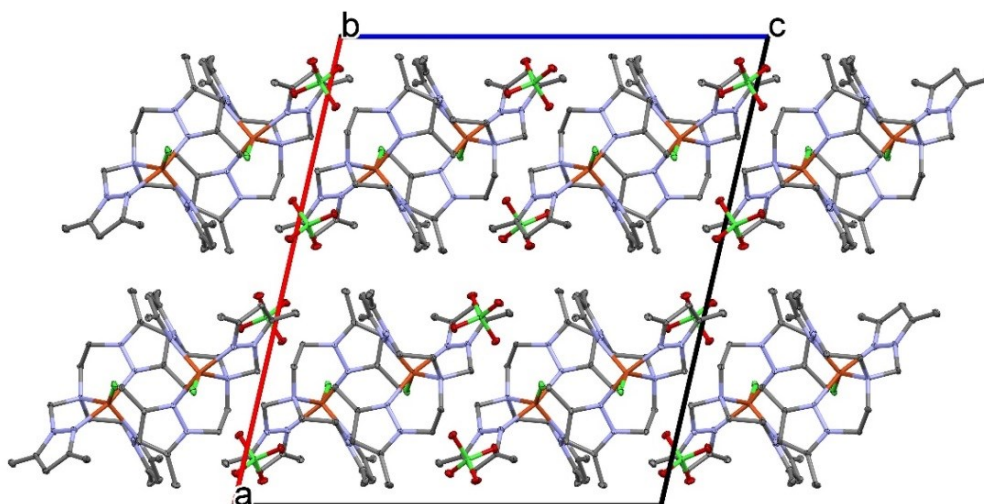

**Fig. S3** Packing view of 4-ClO<sub>4</sub>

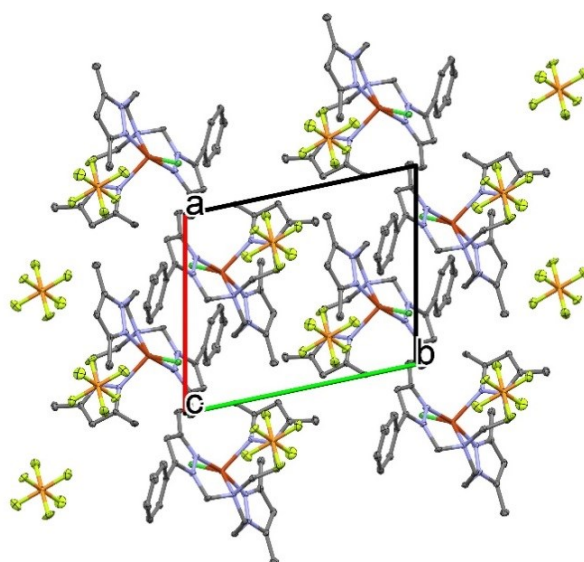

**Fig. S4** Packing view of 5-PF<sub>6</sub>

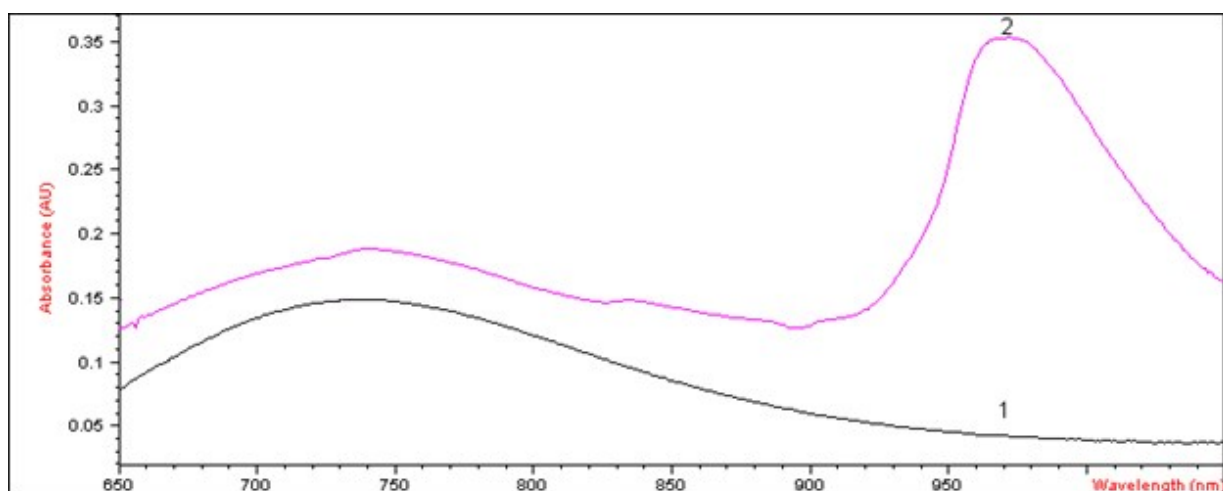

**Fig. S5** Spectral changes of complex **1-PF<sub>6</sub>** ( $6.95 \times 10^{-4}$  M) in: (1) CH<sub>3</sub>CN and (2) H<sub>2</sub>O/CH<sub>3</sub>CN solution (1:4, volume ratio) at room temperature.

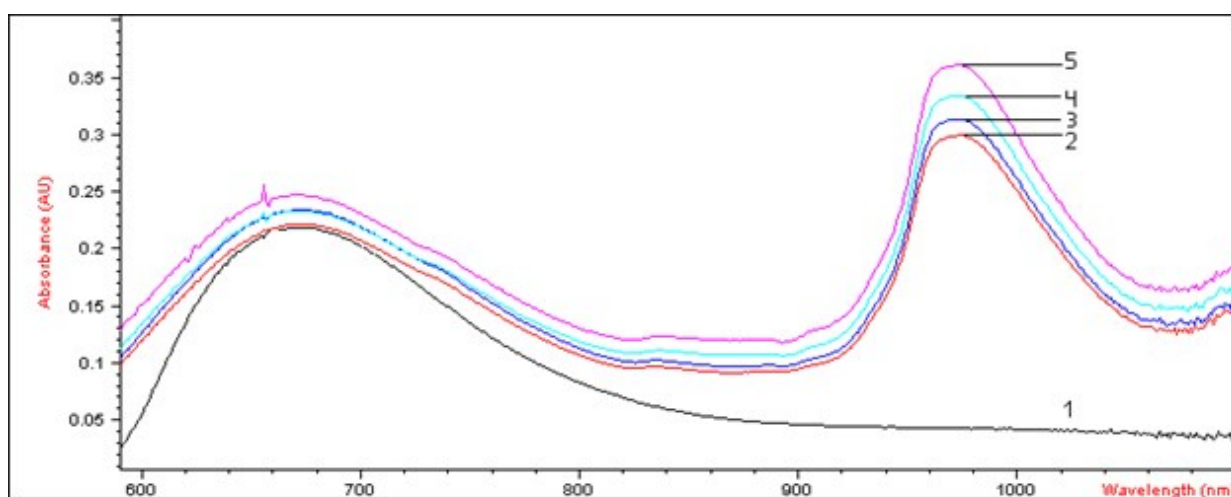

**Fig. S6** Spectrophotometric titration of **2-ClO<sub>4</sub>** ( $8.18 \times 10^{-4}$  M) in H<sub>2</sub>O/CH<sub>3</sub>CN solutions (curve #, volume ratio) with increasing water contents: 1, 0/5 (black); 2, 0.30/5 (red); 3, 0.50/5 (blue); 4, 0.70/5 (turquoise); 5, 1.0/5 (purple) at room temperature.



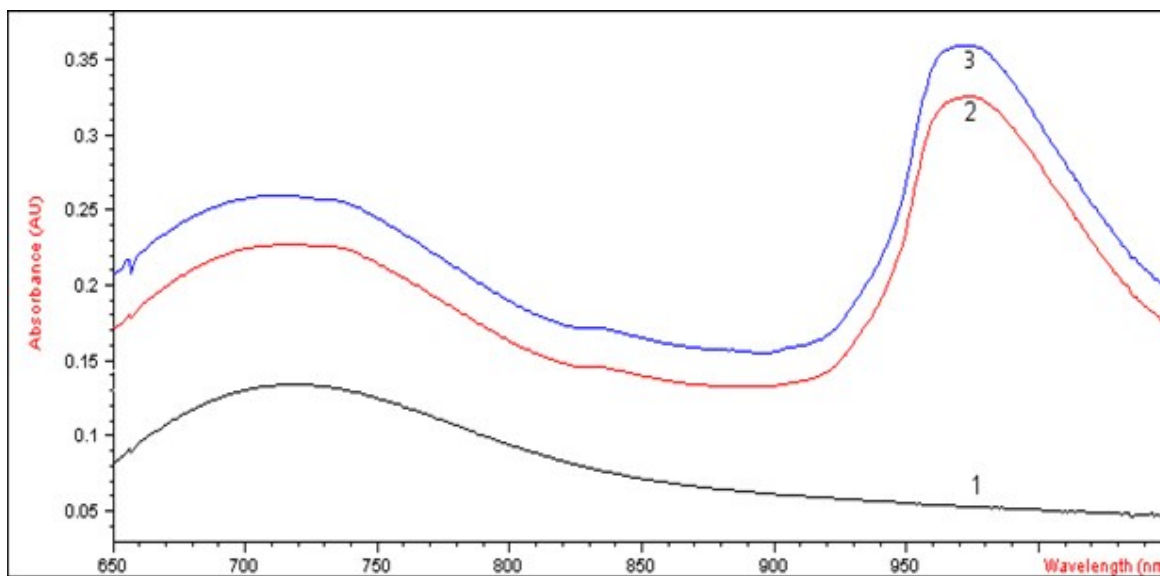

**Fig. S7** Spectral changes of complex **4-PF<sub>6</sub>** ( $8.21 \times 10^{-4}$  M) in: (1) CH<sub>3</sub>CN, (2) H<sub>2</sub>O/CH<sub>3</sub>CN (0.2:4.8) and (3) H<sub>2</sub>O/CH<sub>3</sub>CN (0.4:4.6) solution (v:v ratio) at room temperature.

---

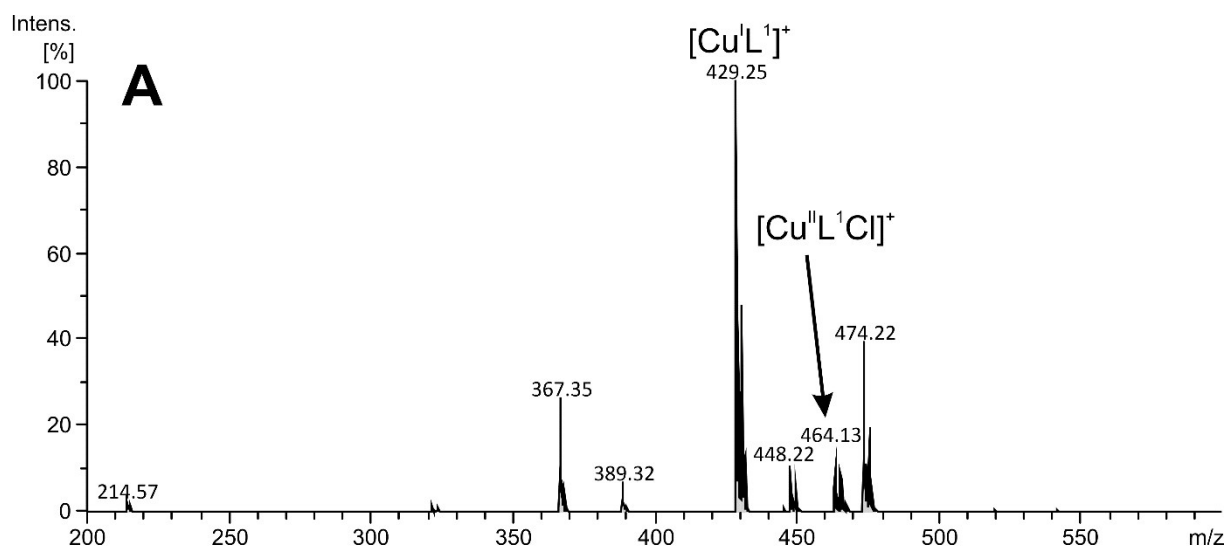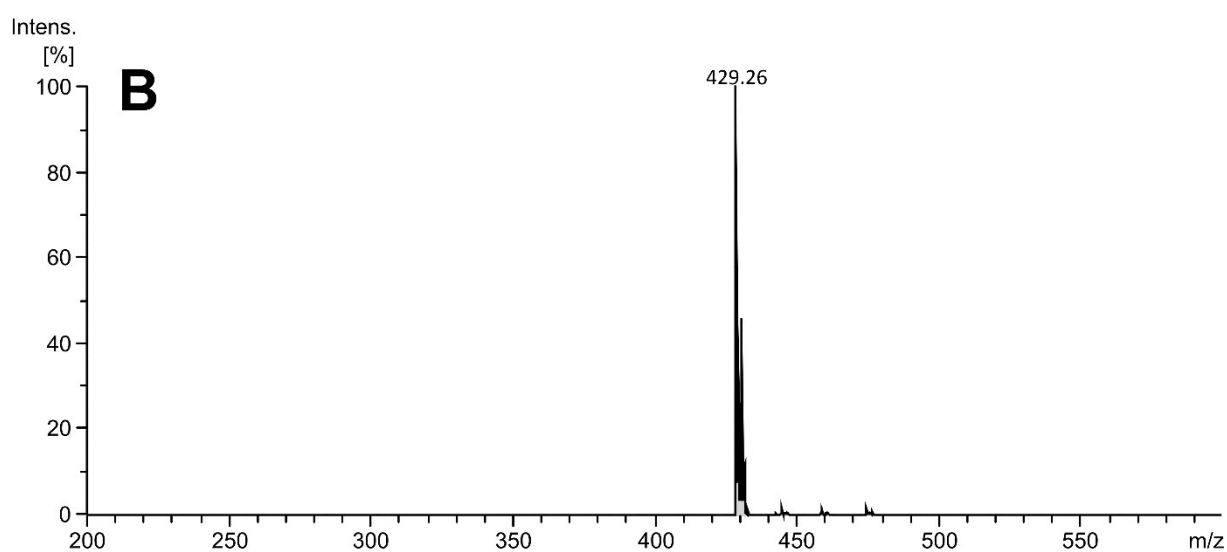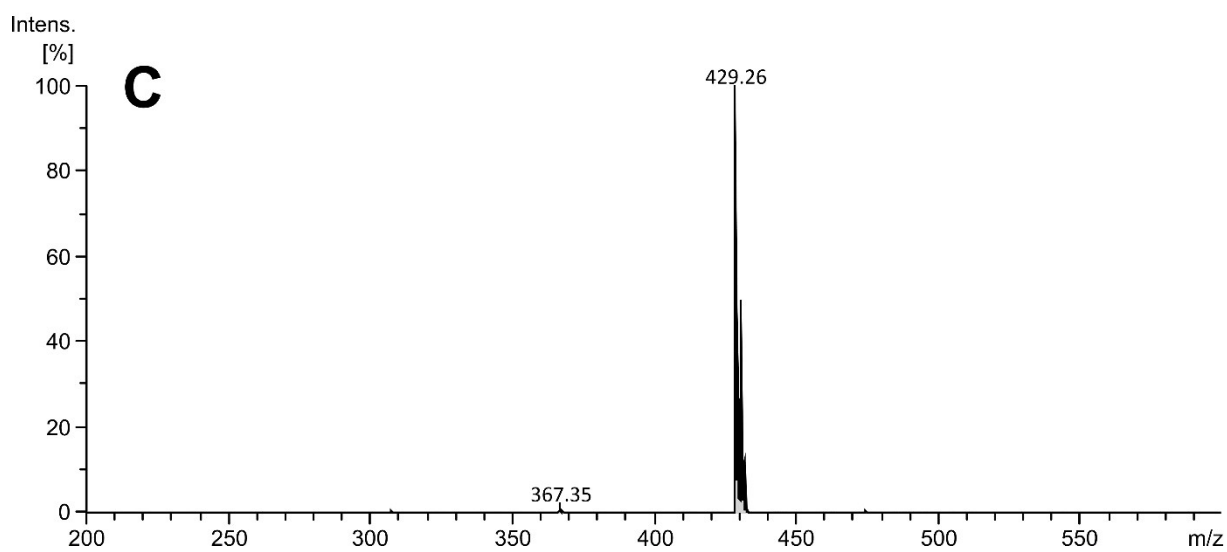

**Fig. S8** The ESI-MS spectra of samples containing the  $[\text{Cu}(\text{L}^1)\text{Cl}]\text{PF}_6$  (**1-PF<sub>6</sub>**) (panel **A**), mixture of (**1**) at 10  $\mu\text{M}$  and 290  $\mu\text{M}$  L-Cys after 60 h of interaction (panel **B**), mixture of (**1**) at 10  $\mu\text{M}$  and 290  $\mu\text{M}$  GSH after 60 h of interaction (panel **C**).

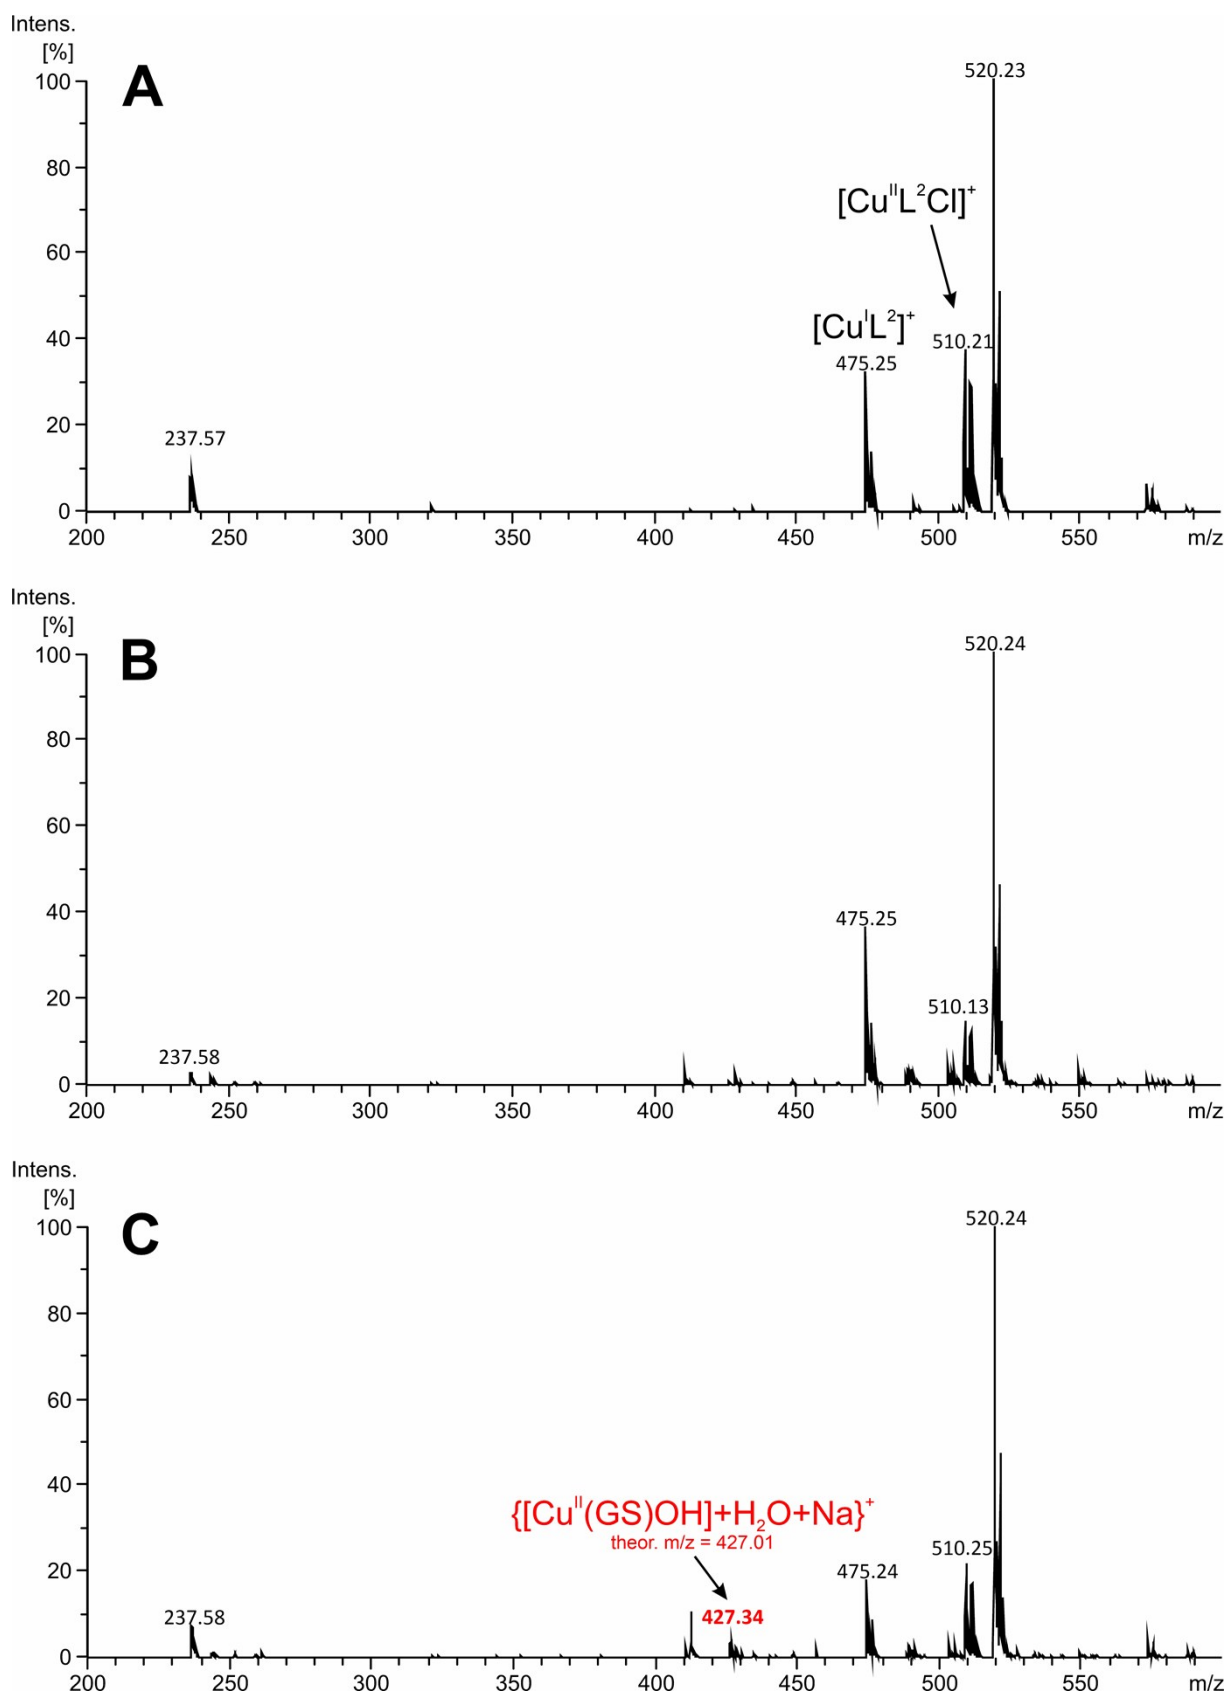

**Fig. S9** The ESI-MS spectra of samples containing the  $[\text{Cu}(\text{L}^2)\text{Cl}]\text{ClO}_4$  (**2-ClO<sub>4</sub>**) (panel **A**), mixture of (**2**) at 10  $\mu\text{M}$  and 290  $\mu\text{M}$  L-Cys after 60 h of interaction (panel **B**), mixture of (**2**) at 10  $\mu\text{M}$  and 290  $\mu\text{M}$  GSH after 60 h of interaction (panel **C**).

Agilent Resolutions Pro

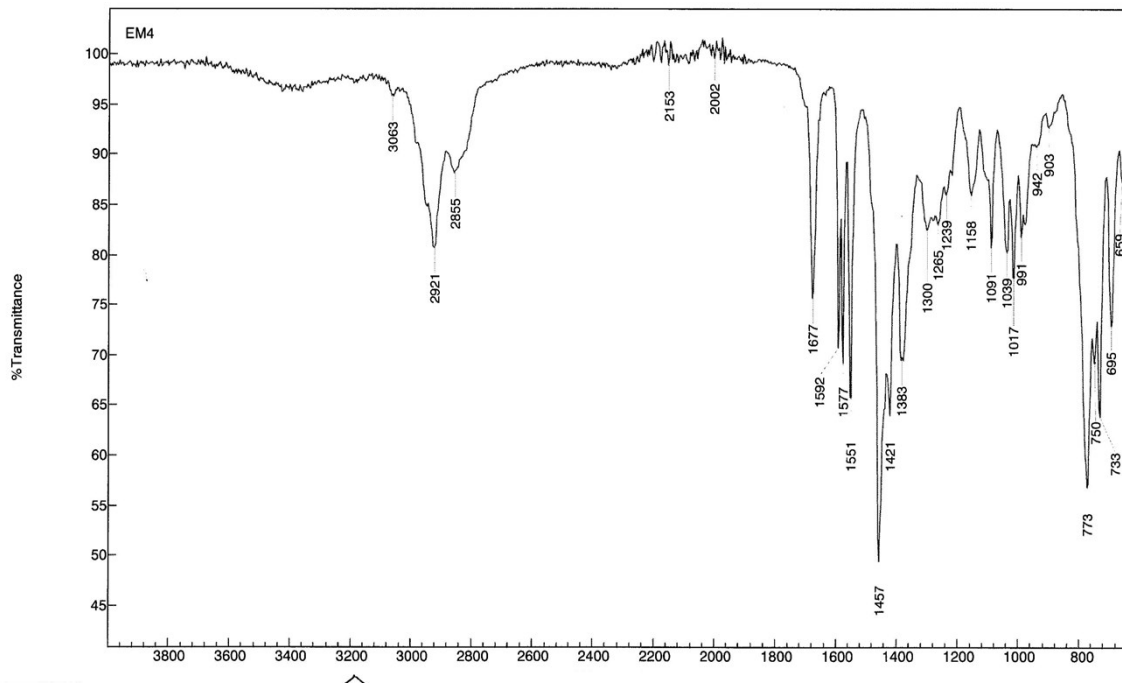

Fig. S10 Solid IR spectrum of L<sup>1</sup>.

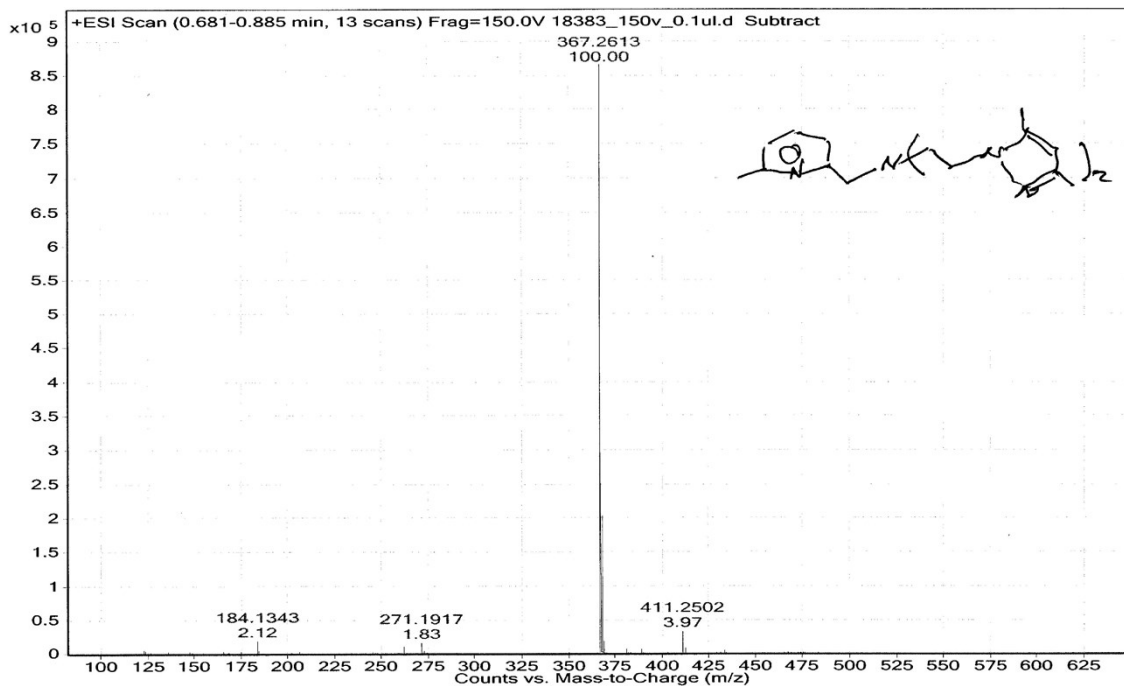

Fig. S11 ESI-MS of L<sup>1</sup> in MeOH.

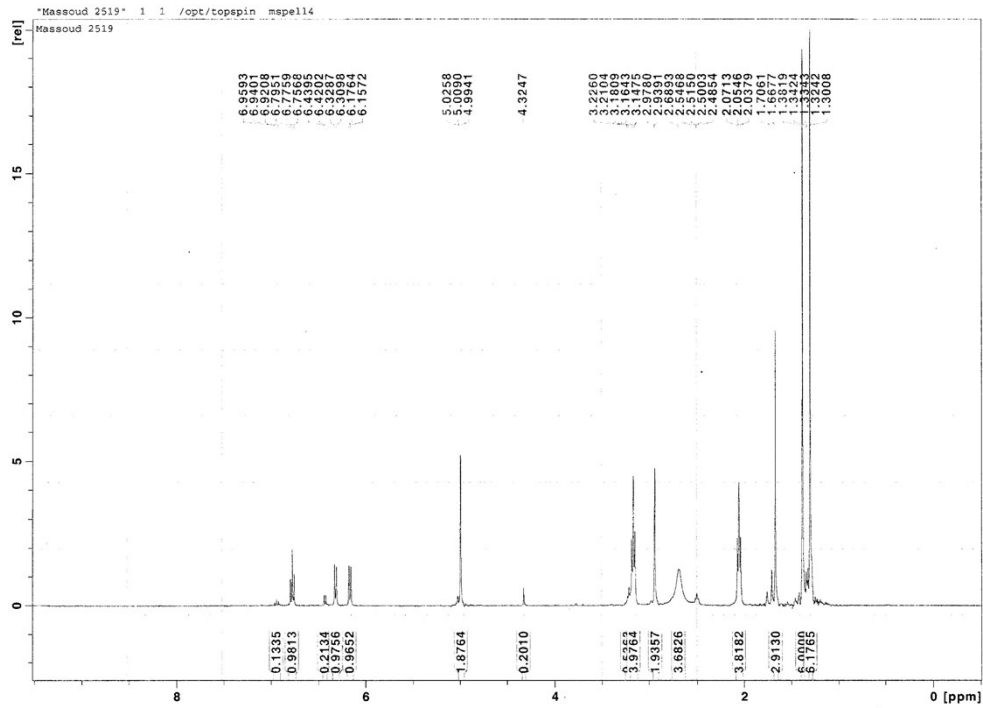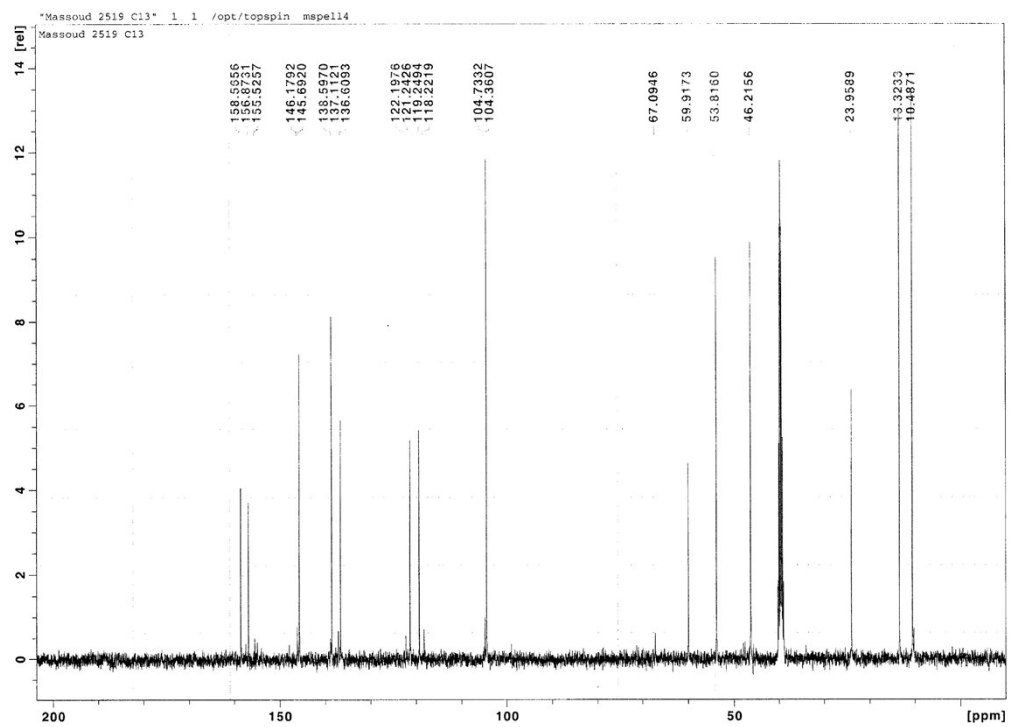

**Fig. S12**  $^1\text{H}$  (top) and  $^{13}\text{C}$  (bottom) NMR spectra of **L<sup>1</sup>** in  $\text{DMSO-}d_6$

*Agilent Resolutions Pro*

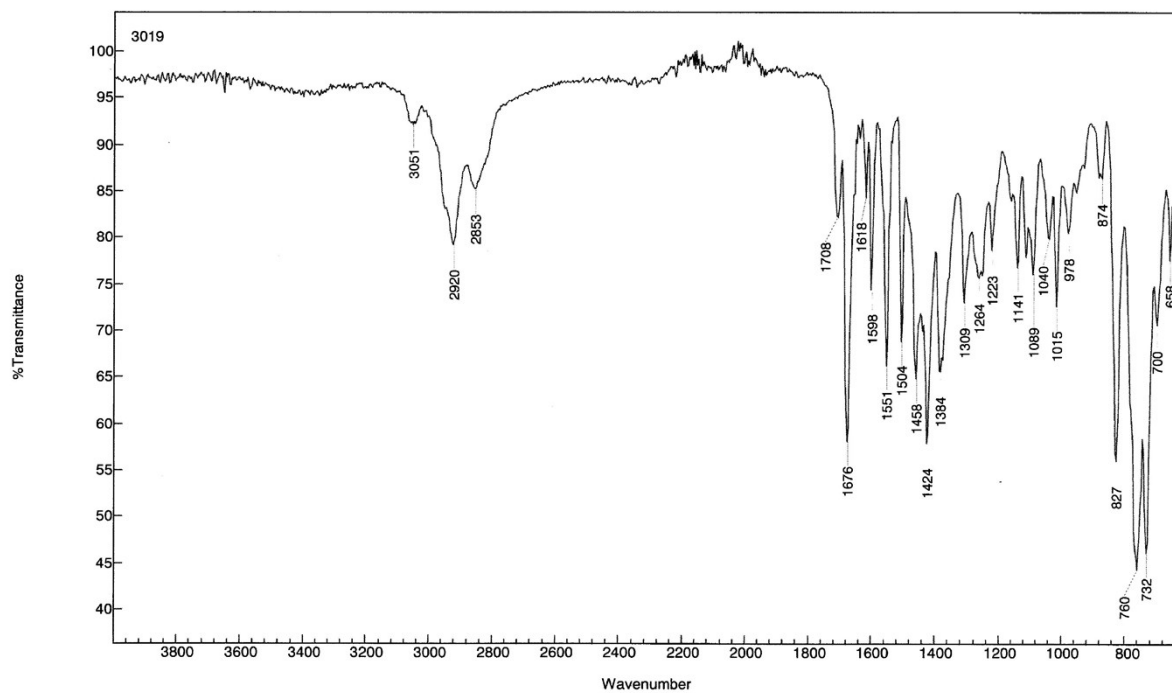

**Fig. S13** Solid IR spectrum of **L<sup>3</sup>**.

*Agilent Resolutions Pro*

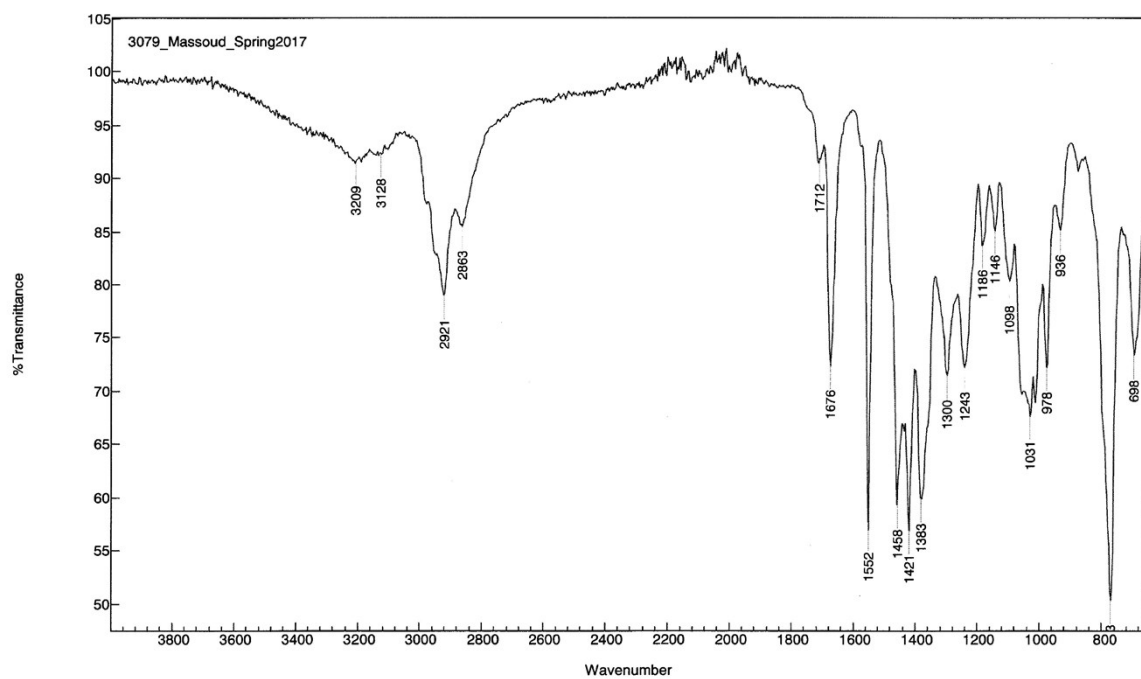

**Fig. S14** Solid IR spectrum of **L<sup>4</sup>**.

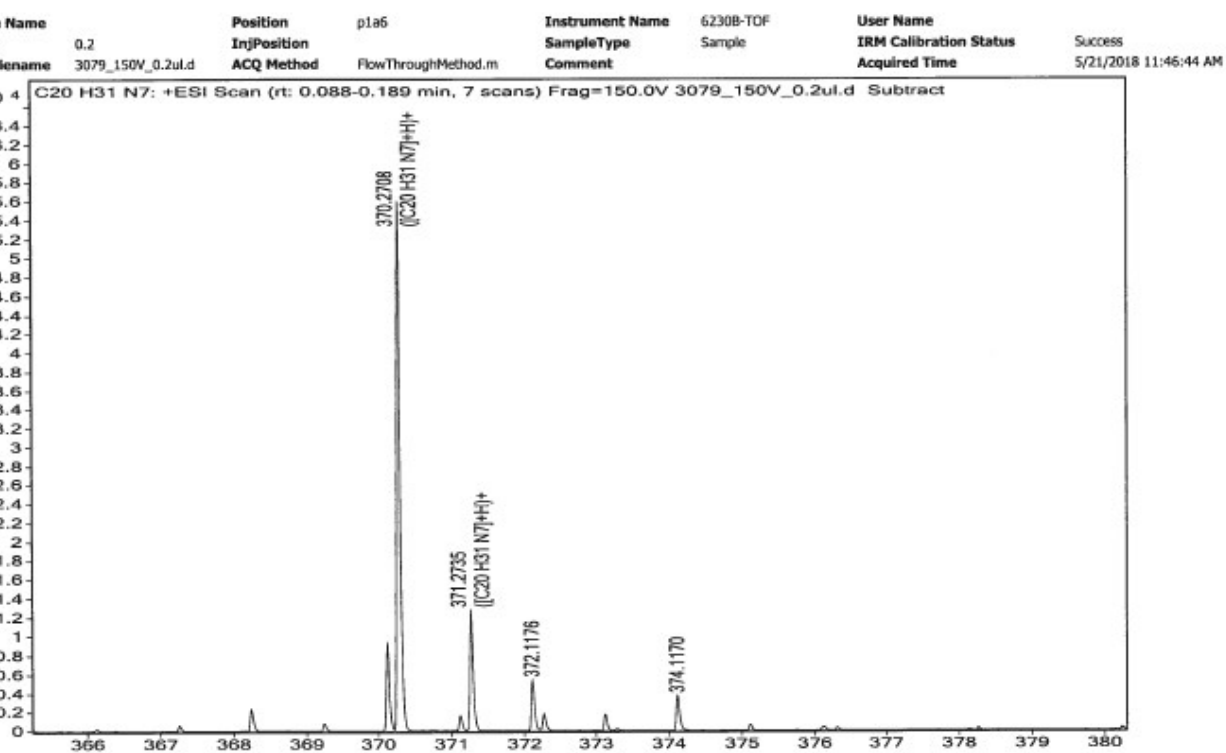

**Fig. S15** ESI-MS of **L<sup>4</sup>** in MeOH

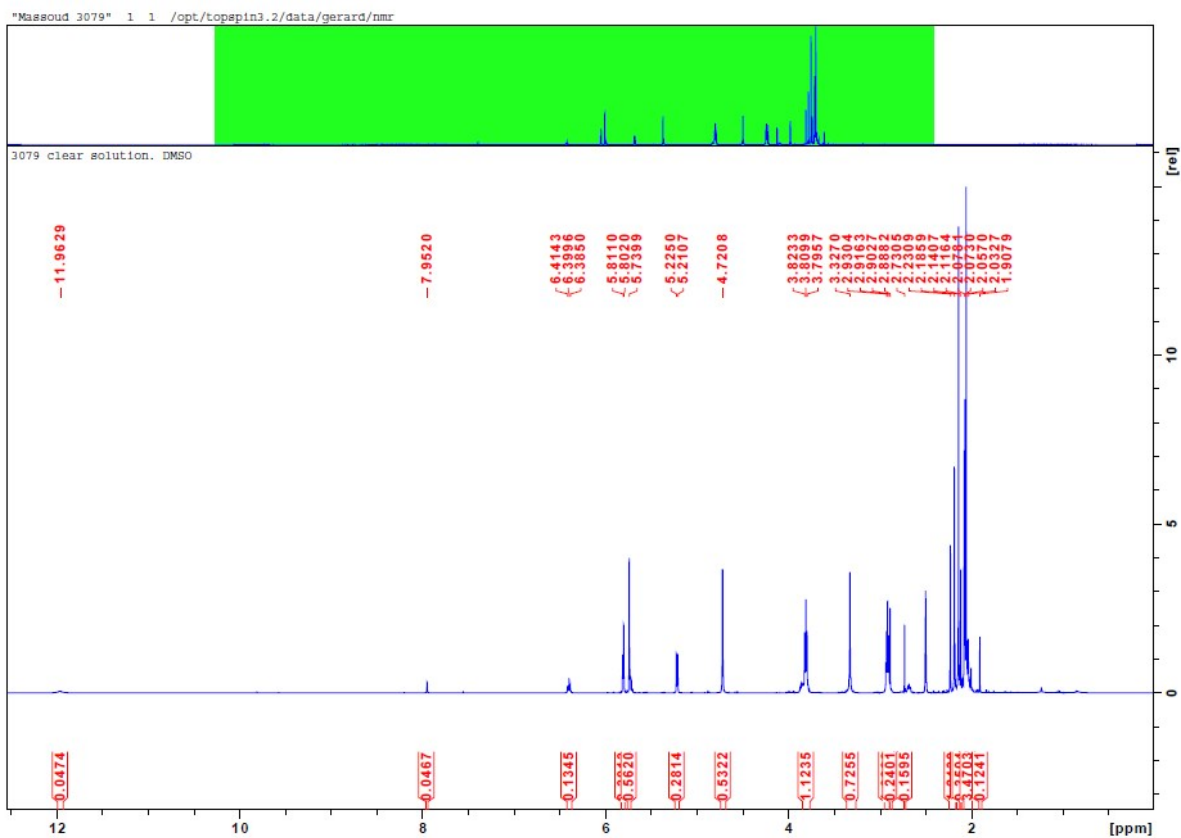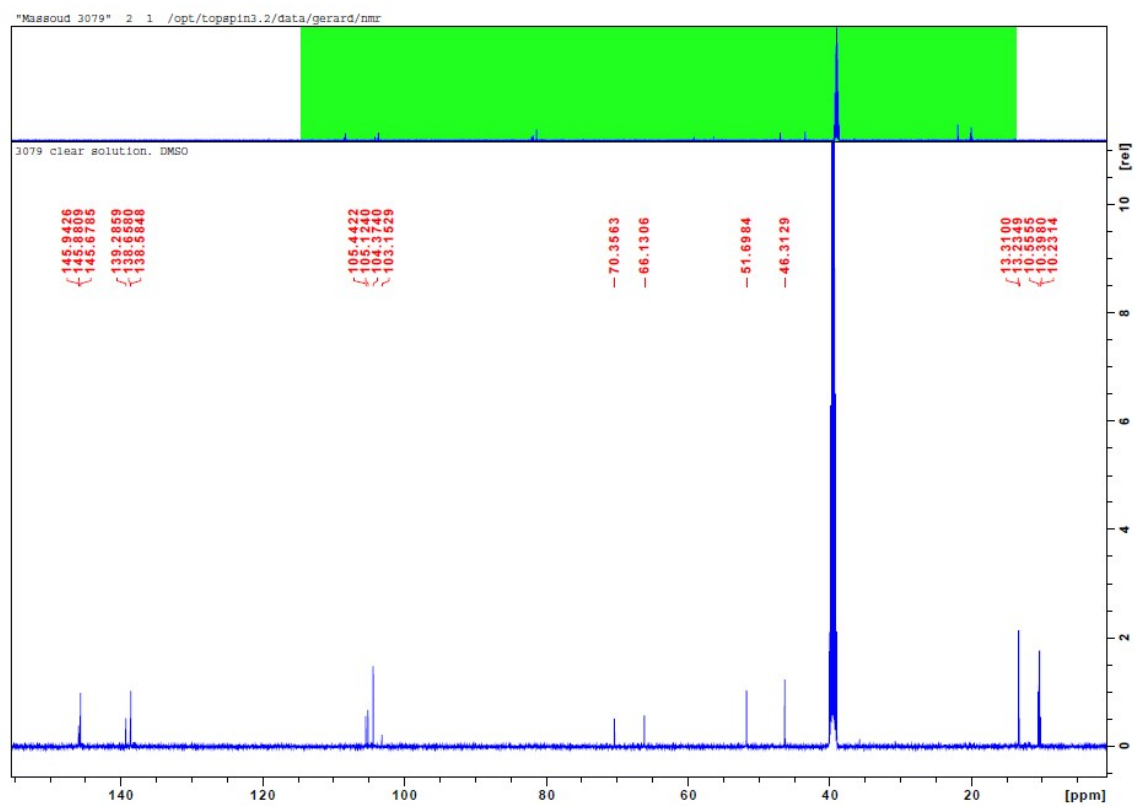

Fig. S16  $^1\text{H}$  (top) and  $^{13}\text{C}$  (bottom) NMR spectra of  $\text{L}^4$  in  $\text{DMSO-}d_6$



Agilent Resolutions Pro

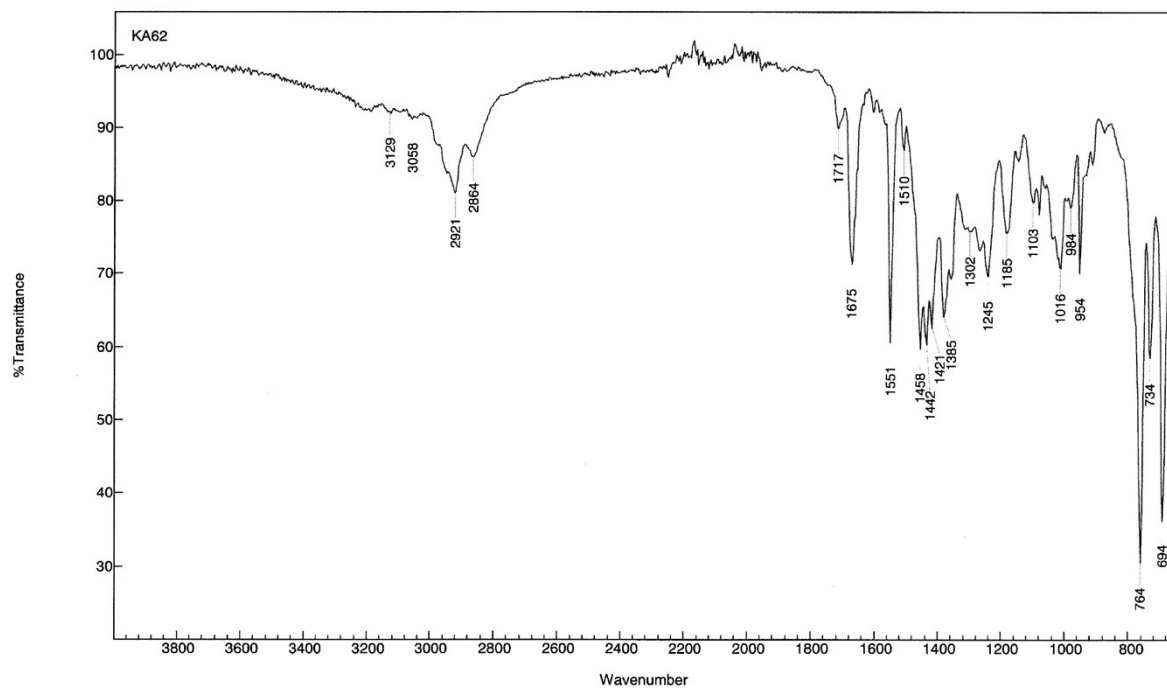

Fig. S17 Solid IR spectrum of L<sup>5</sup>.

| Sample Name   | Position          | pId2        | Instrument Name     | 62308-TOF | User Name              |
|---------------|-------------------|-------------|---------------------|-----------|------------------------|
| Inj Vol       | 0.2               | InjPosition | SampleType          | Sample    | IRM Calibration Status |
| Data Filename | 3104_150V_0.2ul.d | ACQ Method  | FlowThroughMethod.m | Comment   | Acquired Time          |

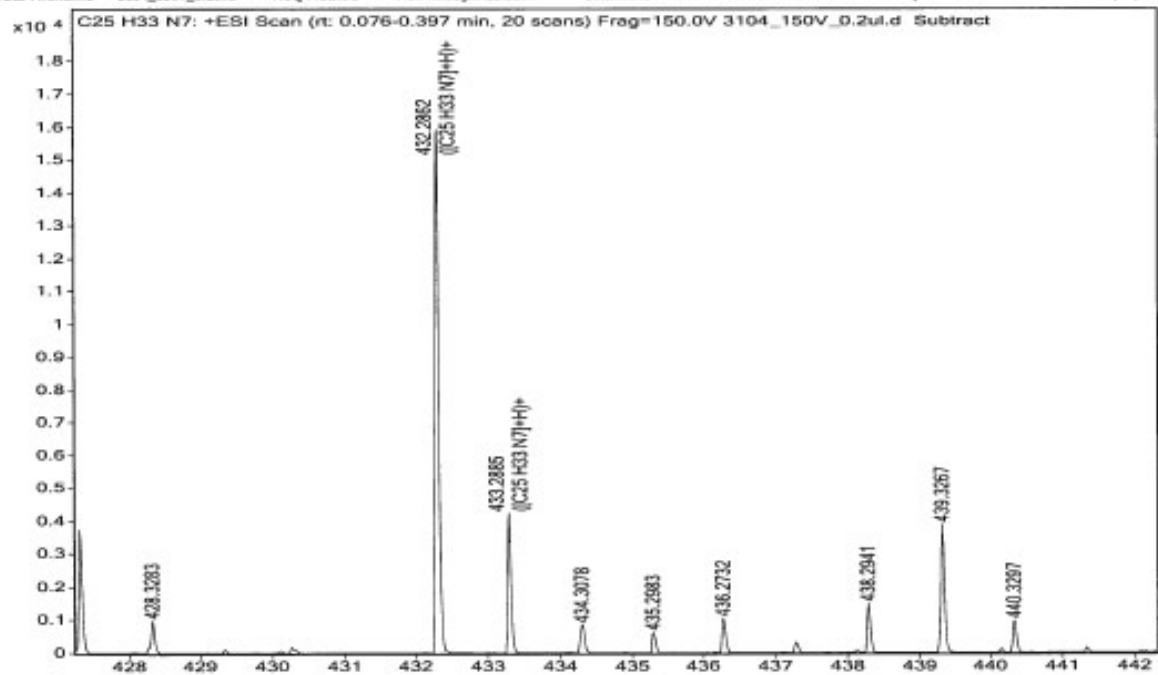

| Sample Name   | Position          | pId2        | Instrument Name     | 62308-TOF | User Name              |
|---------------|-------------------|-------------|---------------------|-----------|------------------------|
| Inj Vol       | 0.2               | InjPosition | SampleType          | Sample    | IRM Calibration Status |
| Data Filename | 3104_150V_0.2ul.d | ACQ Method  | FlowThroughMethod.m | Comment   | Acquired Time          |
|               |                   |             |                     |           | Success                |
|               |                   |             |                     |           | 5/22/2018 2:1          |

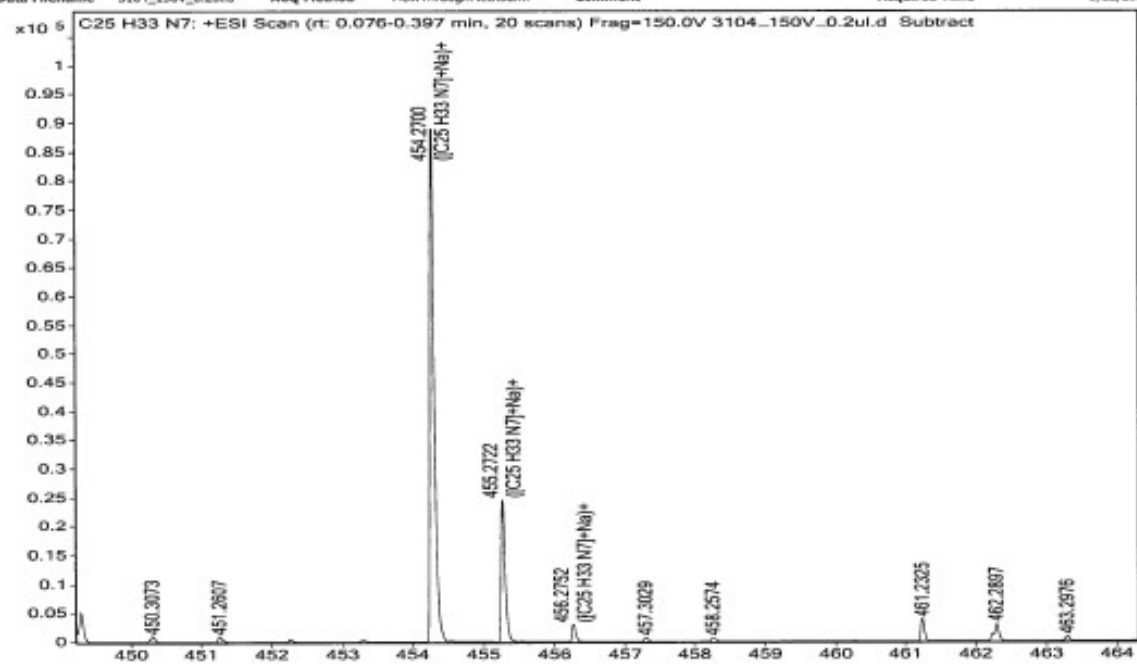

Fig. S18 ESI-MS of L<sup>5</sup> in MeOH

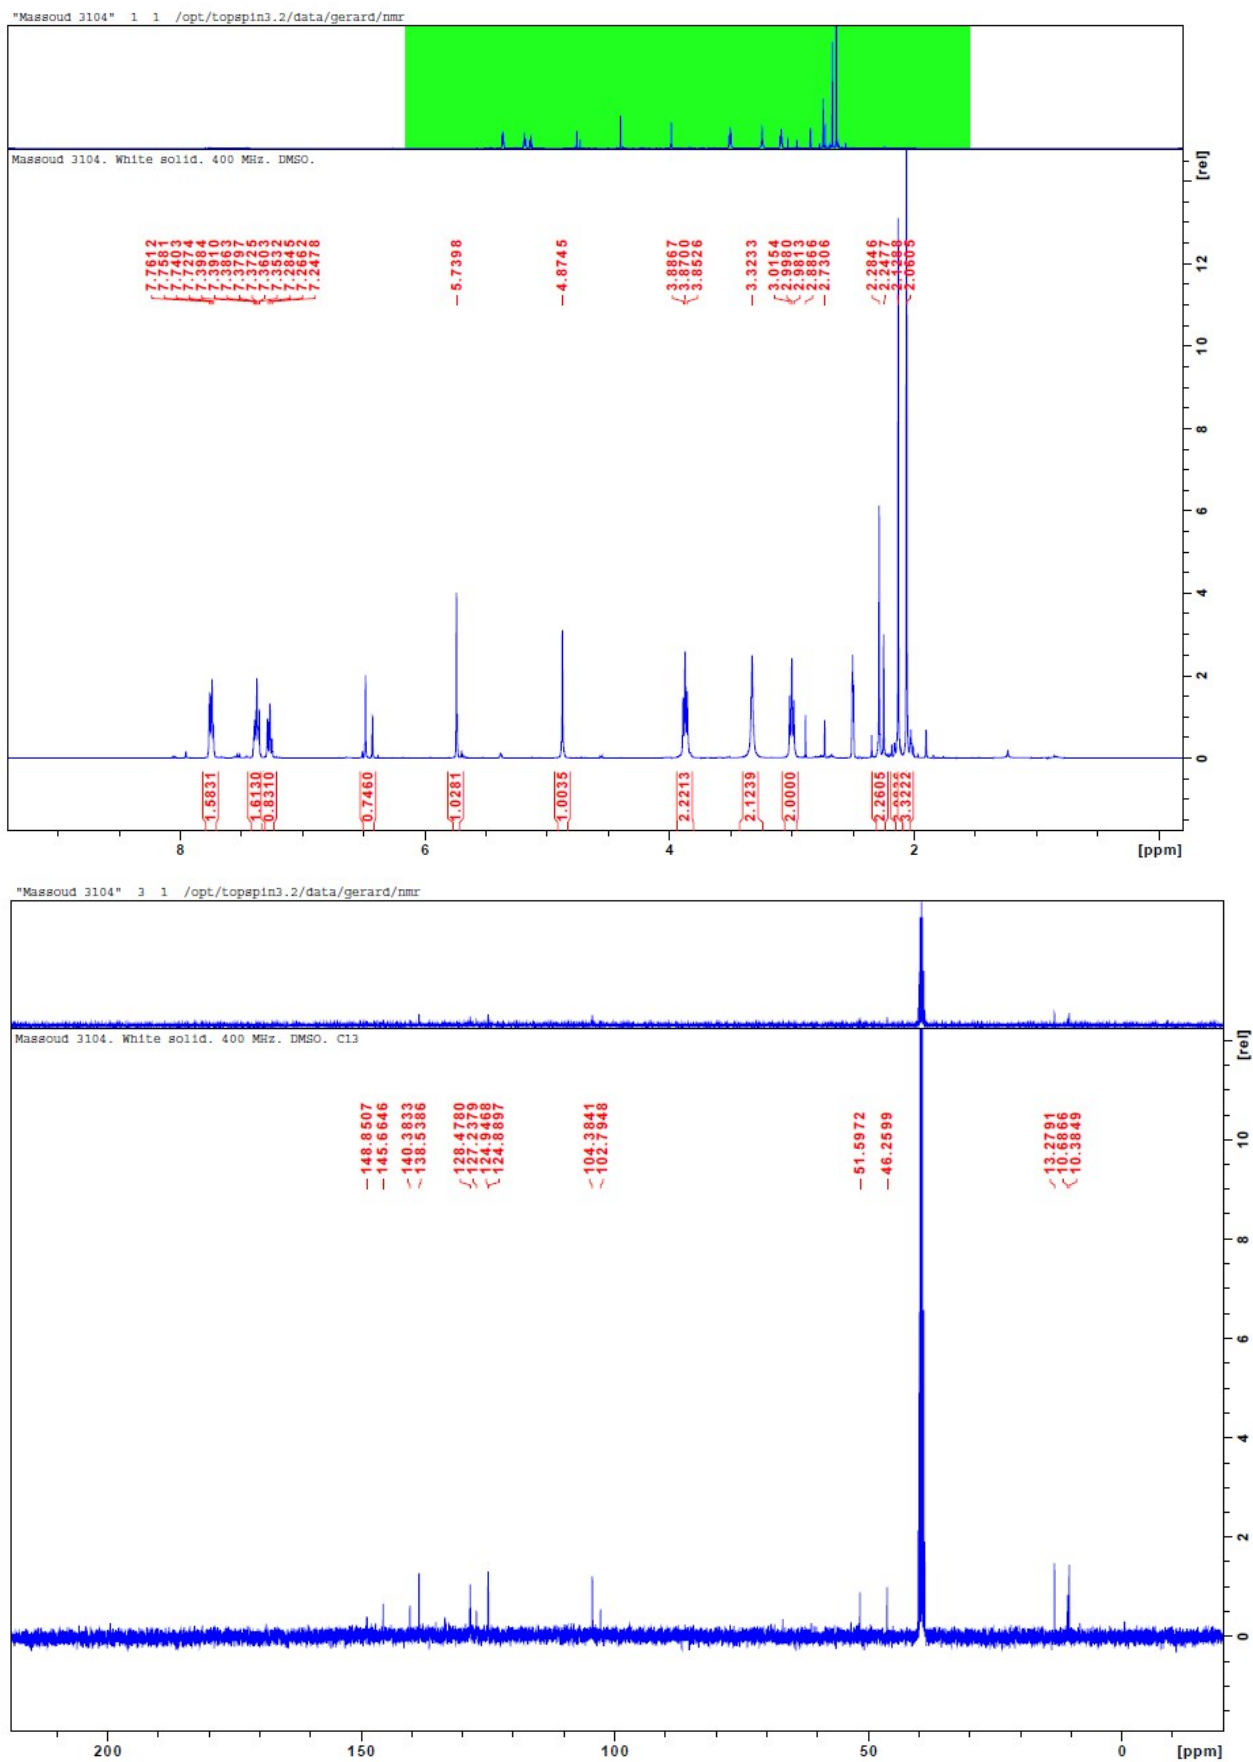

Fig. S19  $^1\text{H}$  (top) and  $^{13}\text{C}$  (bottom) NMR spectra of  $\text{L}^5$  in  $\text{DMSO-}d_6$

**Agilent Resolutions Pro**

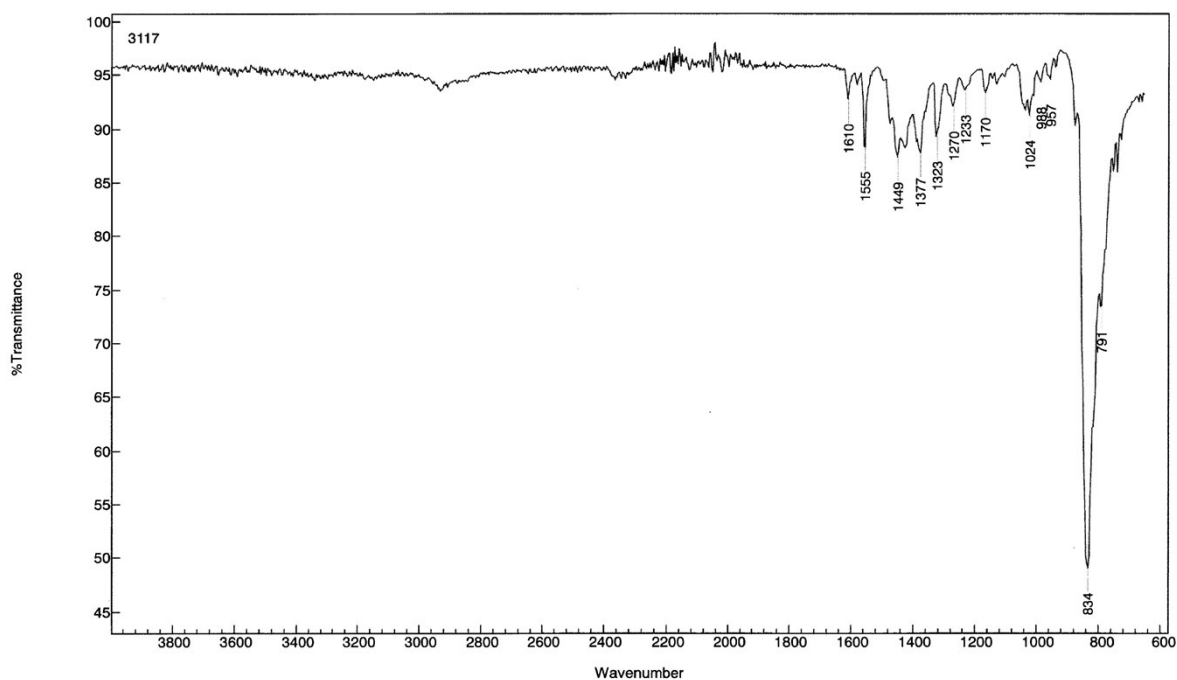

**Fig. S20** Solid IR spectrum of complex 1-PF<sub>6</sub>.

Method file : TEST.M ( modified ) Last update: Date 5/3/2017 Time 3:34:23  
 Information : PM  
 Data File : C:\HPCHEM\1\DATA\3117AN.SD Created : 5/3/17 15:35:33

**Overlaid Spectra:**

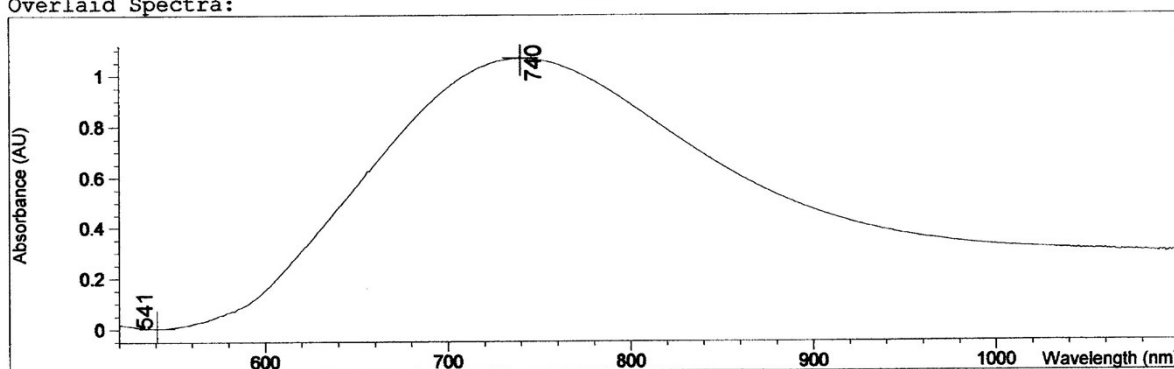

| # | Name | Peaks (nm) | Abs (AU) | Valleys (nm) | Abs (AU)  |
|---|------|------------|----------|--------------|-----------|
| 1 |      | 740.0      | 1.06770  | 541.0        | 3.1457E-3 |

**Fig. S21** Electronic spectrum of complex 1-PF<sub>6</sub> ( $4.652 \times 10^{-3}$  M) in acetonitrile.

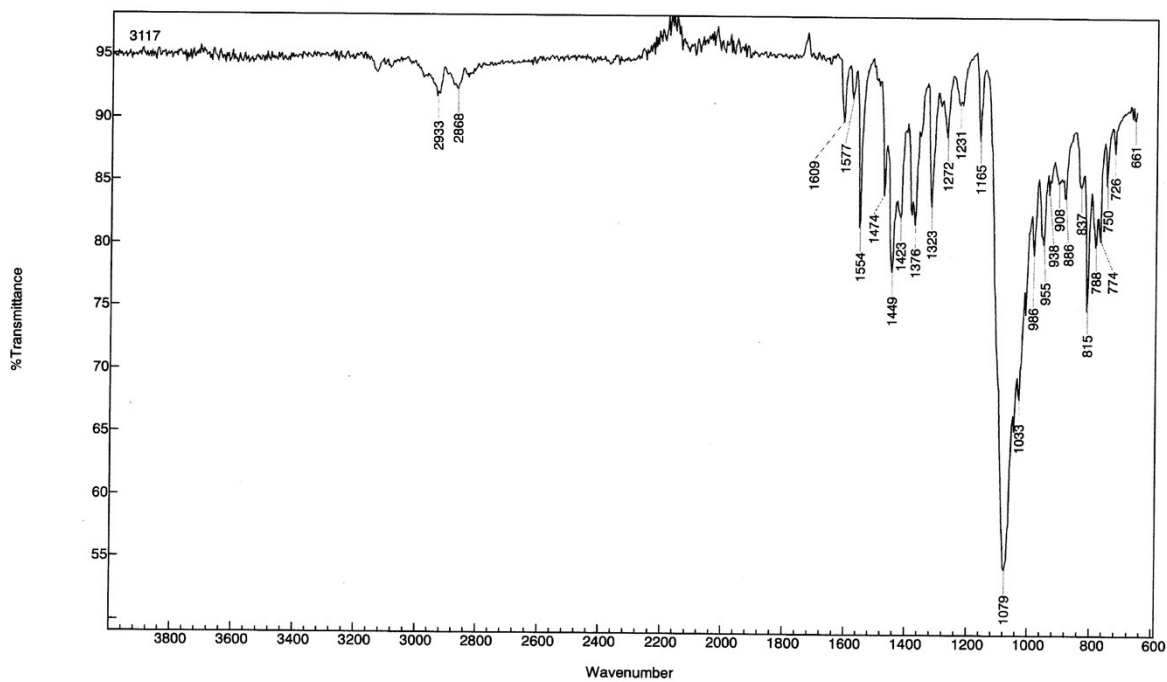

**Fig. S22** Solid IR spectrum of complex **1-ClO<sub>4</sub>**.

Sample Name: p1a6  
Injection Volume: 0.2  
Data File Name: 3117\_150V\_0.2ul.d  
Position: p1a6  
Injection Position: InjPosition  
Acquisition Method: FlowThroughMethod.m  
Instrument Name: 6230B-TOF  
Sample Type: Sample  
User Name: User Name  
IRM Calibration Status: Success  
Comment: Comment  
Acquired Time: 5/21/2018 12:09:16 PM

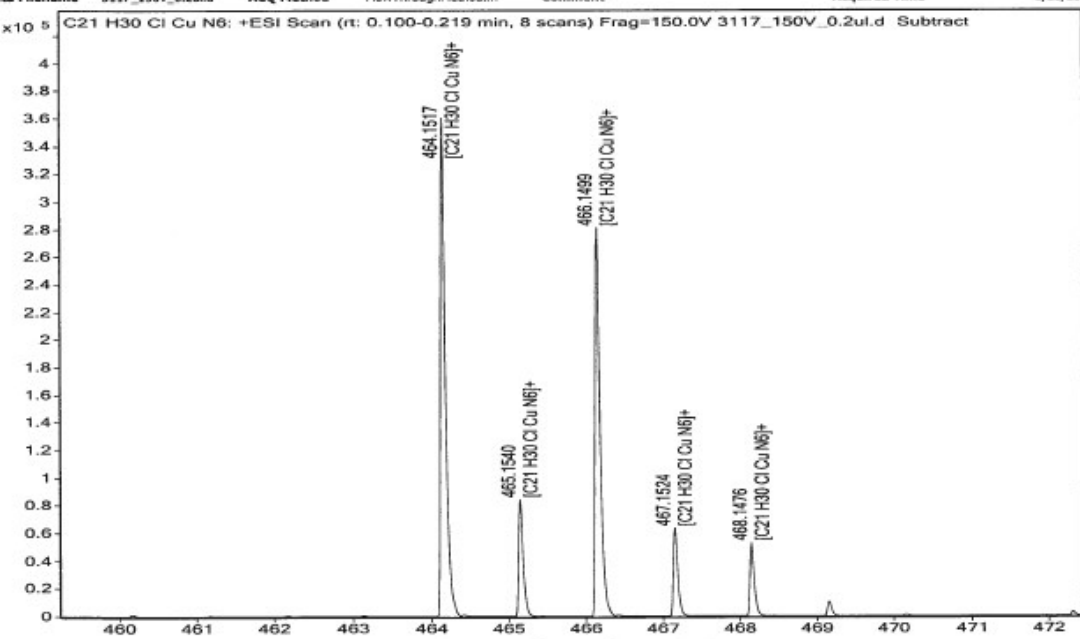

Fig. S23 ESI-MS of complex 1-ClO<sub>4</sub> in CH<sub>3</sub>CN.

2 non green

Conductivity: 334  $\mu$ S/cm

Method file : 3510.M ( modified ) Last update: Date 4/21/2021 Time 11:46:52 AM  
Information : Default Method  
Data File : C:\HPCHEM\1\DATA\2ANMD.SD Created : 4/21/21 11:46:11

Overlaid Spectra:

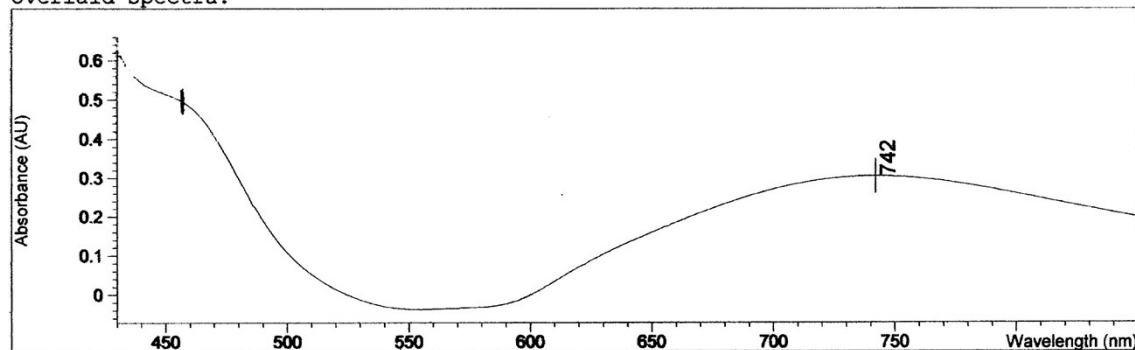

| # | Name     | Peaks (nm) | Abs (AU) |
|---|----------|------------|----------|
| 1 |          | 742.0      | 0.30485  |
| 1 |          | ***        | ***      |
|   | Shoulder | 449        | 0.516777 |

Fig. S24 Electronic spectrum of complex **1-ClO<sub>4</sub>** ( $2.036 \times 10^{-3}$  M) in CH<sub>3</sub>CN.



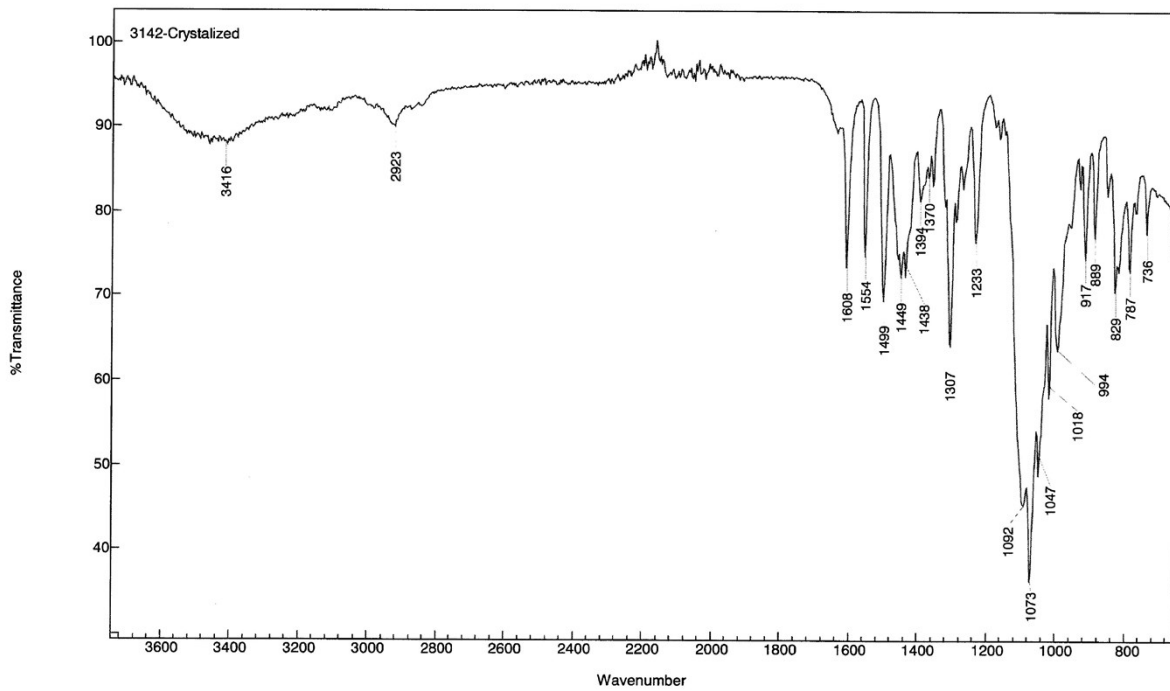

**Fig. S25** Solid IR spectrum of complex **2-ClO<sub>4</sub>**.

|             |                   |             |                     |                 |           |                        |                        |
|-------------|-------------------|-------------|---------------------|-----------------|-----------|------------------------|------------------------|
| Sample Name | 3142              | Position    | p1a2                | Instrument Name | 6230B-TOF | User Name              |                        |
| Volume      | 0.2               | InjPosition |                     | SampleType      | Sample    | IRM Calibration Status | Success                |
| Filename    | 3142_150v_0.2ul.d | ACQ Method  | FlowThroughMethod.m | Comment         |           | Acquired Time          | 5/14/2018 2:51:47 PM ( |

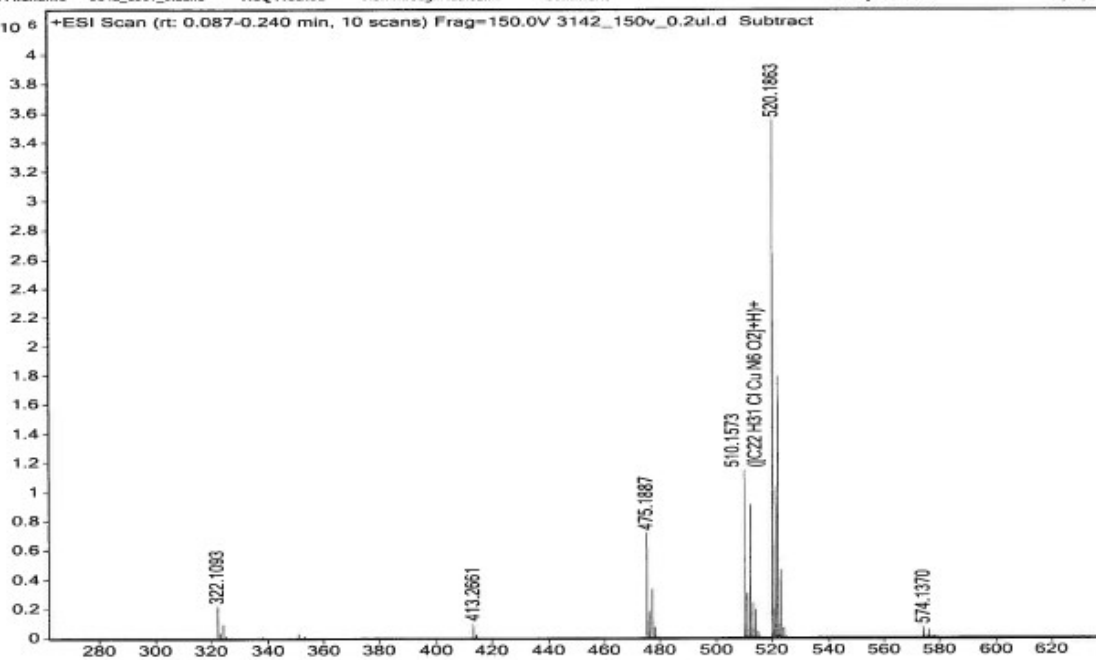

Fig. S26 ESI-MS of complex **2-CIO<sub>4</sub>** in CH<sub>3</sub>CN.

Method file : TEST.M ( modified ) Last update: Date 5/31/2017 Time  
12:01:59 PM  
Information : Default Method  
Data File : <untitled> saved as 3142 an.sd

Overlaid Spectra:

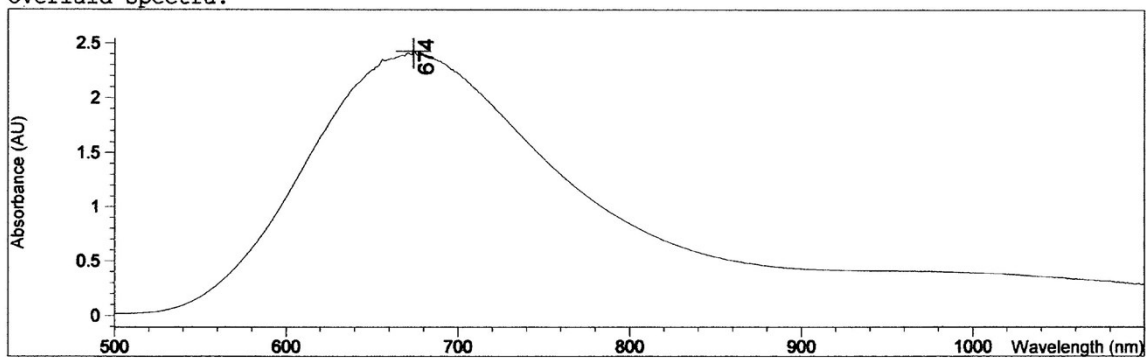

| # | Name | Peaks (nm) | Abs (AU) | Valleys (nm) | Abs (AU) |
|---|------|------------|----------|--------------|----------|
| 1 |      | 674.0      | 2.42510  | ***          | ***      |

Fig. S27 Electronic spectrum of complex **2-ClO<sub>4</sub>** ( $9.640 \times 10^{-3}$  M) in CH<sub>3</sub>CN.

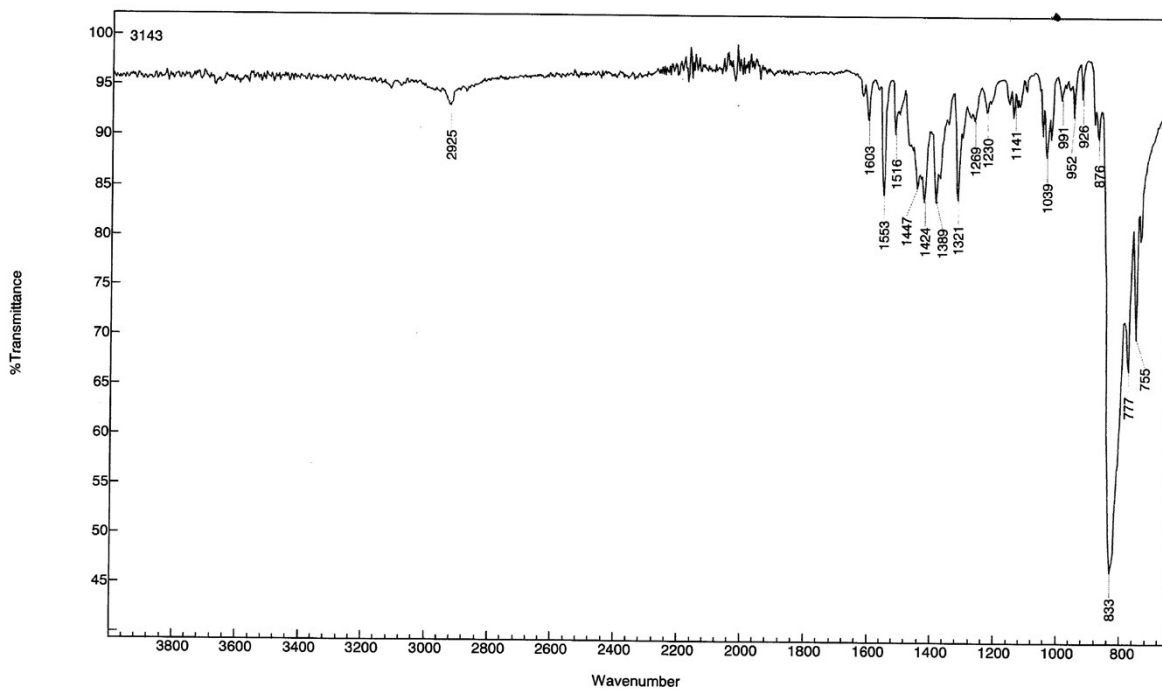

Fig. S28 Solid IR spectrum of complex 3-PF<sub>6</sub>.

=====  
 // Spectrum/Peak Report Date 5/31/2017 Time 11:51:03 Page 1 of 1  
 =====

Method file : TEST.M ( modified ) Last update: Date 5/31/2017 Time 11:50:38 AM  
 Information : Default Method  
 Data File : C:\HPCHEM\1\DATA\3143AN.SD Created : 5/31/17 11:52:43

Overlaid Spectra:

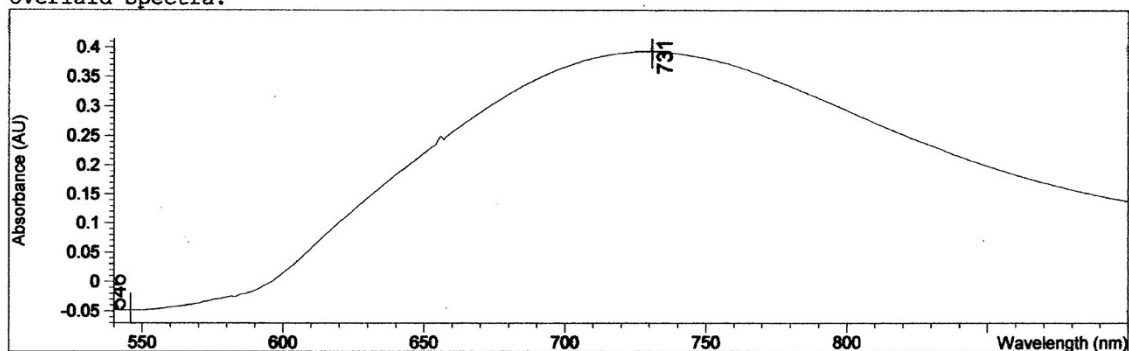

| # | Name | Peaks (nm) | Abs (AU) | Valleys (nm) | Abs (AU)   |
|---|------|------------|----------|--------------|------------|
| 1 |      | 731.0      | 0.39287  | 546.0        | -4.8015E-2 |

Fig. S29 Electronic spectrum of complex 3-PF<sub>6</sub> (1.655 x 10<sup>-3</sup> M) in CH<sub>3</sub>CN.

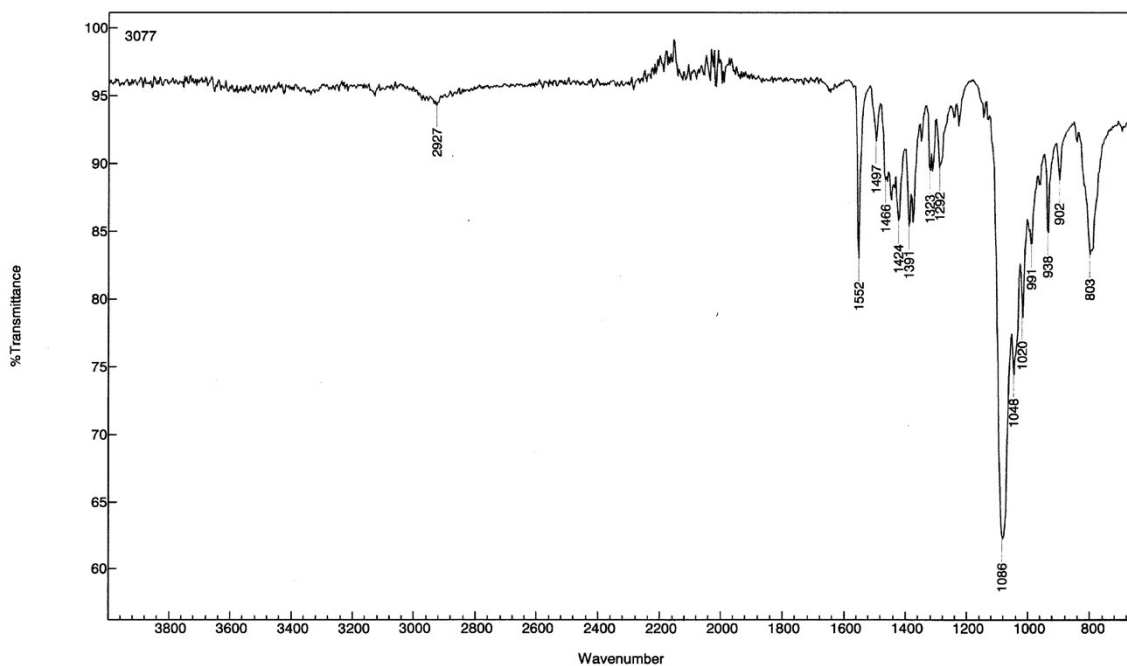

Fig. S30 Solid IR spectrum of complex 4-ClO<sub>4</sub>.

Method file : TEST.M ( modified ) Last update: Date 1/23/2017 Time  
 Information : Default Method

Overlaid Spectra:

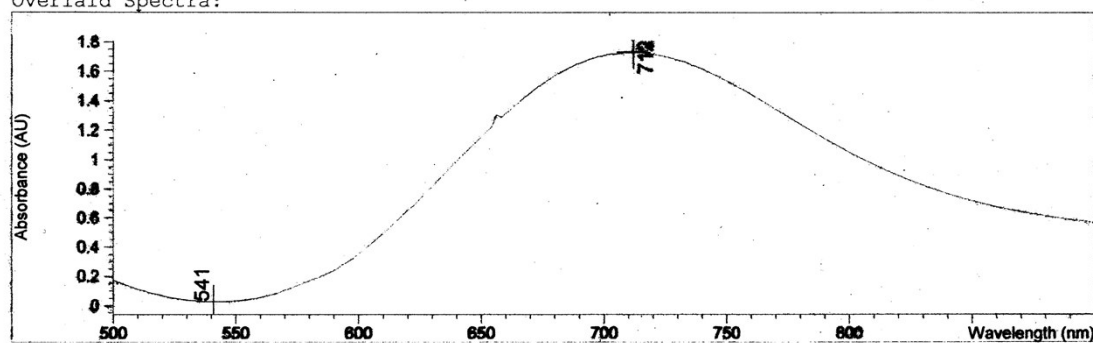

Fig. S31 Electronic spectrum of complex 4-ClO<sub>4</sub> ( $7.085 \times 10^{-3}$  M) in CH<sub>3</sub>CN

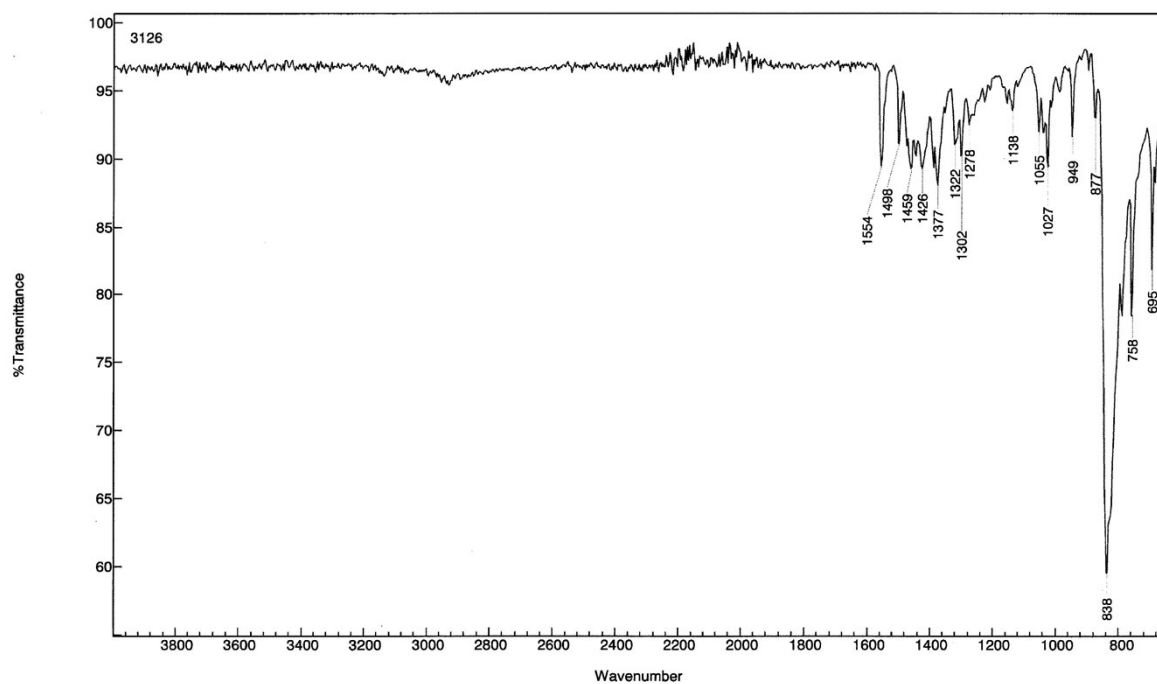

**Fig. S32** Solid IR spectrum of complex **5-PF<sub>6</sub>**.

Sample Name  
Vol 0.2  
Sample Filename 3126\_150V\_0.2ul.d  
Position p1a9  
InjPosition  
ACQ Method FlowThroughMethod.m  
Instrument Name 6230B-TDF  
SampleType Sample  
Comment  
User Name  
IRM Calibration Status Success  
Acquired Time 5/21/2018 12:19:52 PM

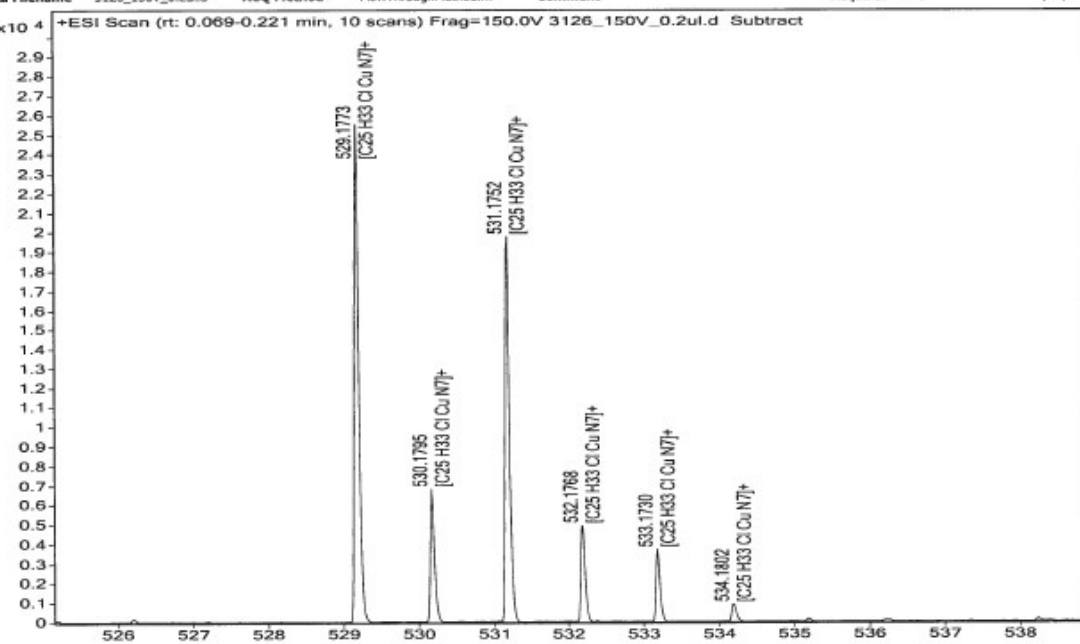

Fig. S33 ESI-MS of complex **5** in CH<sub>3</sub>CN

Method file : TEST.M ( modified ) Last update: Date 5/3/2017 Time 3:25:34  
Information : PM  
Data File : C:\HPCHEM\1\DATA\3126AN.SI Created : 5/3/17 15:21:19

Overlaid Spectra:

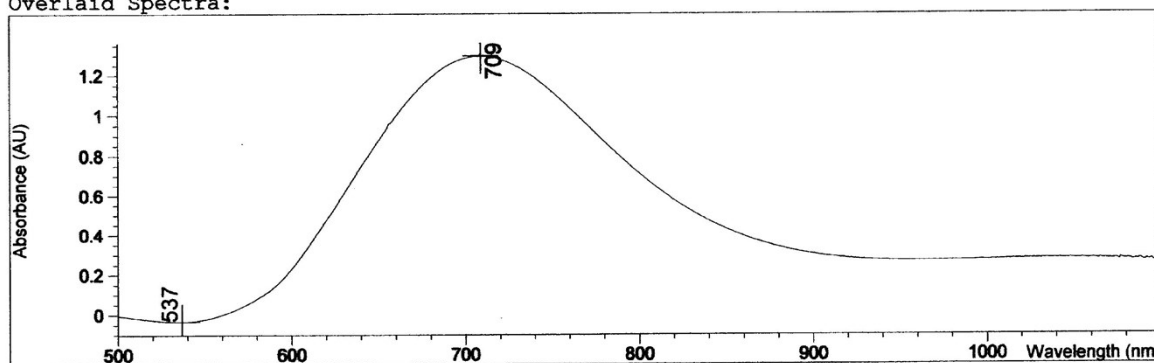

| # | Name | Peaks (nm) | Abs (AU) | Valleys (nm) | Abs (AU)   |
|---|------|------------|----------|--------------|------------|
| 1 |      | 709.0      | 1.29580  | 537.0        | -3.3723E-2 |

Fig. S34 Electronic spectrum of complex 5-PF<sub>6</sub> (4.411 x 10<sup>-3</sup> M) in CH<sub>3</sub>CN
